# Supplementary material for: Investigating isoform switching in RHBDF2 and its role in neoplastic growth in breast cancer
Source: PeerJ. 2022 Nov 25;10:e14124. doi: 10.7717/peerj.14124 (PMC9703992; doi:10.7717/peerj.14124)
Supplement: Supplemental Information 3 [file peerj-10-14124-s003.xlsx]

## Sheet: gene_sets_canonical to cub
WP_SYNAPTIC_SIGNALING_PATHWAYS_ASSOCIATED_WITH_AUTISM_SPECTRUM_DISORDER	http://www.gsea-msigdb.org/gsea/msigdb/cards/WP_SYNAPTIC_SIGNALING_PATHWAYS_ASSOCIATED_WITH_AUTISM_SPECTRUM_DISORDER	MTOR	AKT1	PRKAB1	PRKAG2	MIR5004
WP_PARKINUBIQUITIN_PROTEASOMAL_SYSTEM_PATHWAY	http://www.gsea-msigdb.org/gsea/msigdb/cards/WP_PARKINUBIQUITIN_PROTEASOMAL_SYSTEM_PATHWAY	TUBB	UBA1	TUBB4A	UBE2J2	TUBA1C	UBE2J1	TUBA4A	HSPA1L
WP_AUTOPHAGY	http://www.gsea-msigdb.org/gsea/msigdb/cards/WP_AUTOPHAGY	PRKAB1	MAP1LC3B	PRKAG2	ULK1	MLST8	AKT1S1	MTOR
WP_HOSTPATHOGEN_INTERACTION_OF_HUMAN_CORONA_VIRUSES_AUTOPHAGY	http://www.gsea-msigdb.org/gsea/msigdb/cards/WP_HOSTPATHOGEN_INTERACTION_OF_HUMAN_CORONA_VIRUSES_AUTOPHAGY	ATG10	MAP1LC3A	MTOR	ZFYVE1	ULK1
WP_ATM_SIGNALING_NETWORK_IN_DEVELOPMENT_AND_DISEASE	http://www.gsea-msigdb.org/gsea/msigdb/cards/WP_ATM_SIGNALING_NETWORK_IN_DEVELOPMENT_AND_DISEASE	TRIM28	AURKB	KAT5	CDK1	MTOR
WP_DNA_REPAIR_PATHWAYS_FULL_NETWORK	http://www.gsea-msigdb.org/gsea/msigdb/cards/WP_DNA_REPAIR_PATHWAYS_FULL_NETWORK	POLE4	RBX1	PMS2	FAAP100	RPA1	POLD1	POLD2	POLE	MPG	GTF2H4	FANCE	NTHL1	ERCC5	FANCG	APEX2	RAD23A	RAD51
WP_PI3KAKTMTOR_SIGNALING_PATHWAY_AND_THERAPEUTIC_OPPORTUNITIES	http://www.gsea-msigdb.org/gsea/msigdb/cards/WP_PI3KAKTMTOR_SIGNALING_PATHWAY_AND_THERAPEUTIC_OPPORTUNITIES	NOS3	ULK1	CDKN1B	MTOR	AKT1	TFEB
WP_NUCLEOTIDE_EXCISION_REPAIR	http://www.gsea-msigdb.org/gsea/msigdb/cards/WP_NUCLEOTIDE_EXCISION_REPAIR	ERCC5	POLE4	RBX1	GTF2H4	RPA1	POLD1	RAD23A	POLD2	POLE
WP_FACTORS_AND_PATHWAYS_AFFECTING_INSULINLIKE_GROWTH_FACTOR_IGF1AKT_SIGNALING	http://www.gsea-msigdb.org/gsea/msigdb/cards/WP_FACTORS_AND_PATHWAYS_AFFECTING_INSULINLIKE_GROWTH_FACTOR_IGF1AKT_SIGNALING	PRKAB1	ILK	TNFRSF1A	SMAD2	MLST8	AKT1S1	MAP1LC3A	MTOR	AKT1
WP_MRNA_PROCESSING	http://www.gsea-msigdb.org/gsea/msigdb/cards/WP_MRNA_PROCESSING	NCBP2	CPSF4	CELF2	SRSF10	SNRNP70	SNRPA1	SNRPB2	SNRPB	U2AF2	CPSF1	LSM2	PTBP1	SF3A1	SUPT5H	SRSF2	HNRNPA1	DHX15	HNRNPA2B1	HNRNPD	HNRNPC	HNRNPAB
WP_CYTOPLASMIC_RIBOSOMAL_PROTEINS	http://www.gsea-msigdb.org/gsea/msigdb/cards/WP_CYTOPLASMIC_RIBOSOMAL_PROTEINS	RPL27A	RPS28	RPL29	RPL28	RPS29	RPS6KA1	RPS9	RPSA	RPL8	RPL13	RPS13	RPS14	RPS2	RPS16
WP_FOCAL_ADHESIONPI3KAKTMTORSIGNALING_PATHWAY	http://www.gsea-msigdb.org/gsea/msigdb/cards/WP_FOCAL_ADHESIONPI3KAKTMTORSIGNALING_PATHWAY	GNG11	LAMA1	GNB2	NOS3	ULK1	HIF1A	FLT4	PHLPP2	AKT1S1	ITGA5	ITGA7	EFNA2	CDKN1B	CASP9	MTOR	ITGAV	IFNB1	IFNAR1	PPP2CB	RAB11B	IBSP	ELAVL1	MLST8	MIR3652	COL5A3	JAK3	AKT1	PGF	CSF3	GRB2	LAMC3	GNB1
WP_SENESCENCE_AND_AUTOPHAGY_IN_CANCER	http://www.gsea-msigdb.org/gsea/msigdb/cards/WP_SENESCENCE_AND_AUTOPHAGY_IN_CANCER	TGFB1	LAMP1	ULK1	IGFBP7	MAP1LC3A	E2F1	MAP1LC3B	MLST8	AKT1S1	IRF5	GABARAP	MAP2K3	SLC39A3	HMGA1	SLC39A1	CDKN1B	MTOR	SRC	JUN	ATG10	IFNB1	SQSTM1	GSN
WP_SARSCOV2_INNATE_IMMUNITY_EVASION_AND_CELLSPECIFIC_IMMUNE_RESPONSE	http://www.gsea-msigdb.org/gsea/msigdb/cards/WP_SARSCOV2_INNATE_IMMUNITY_EVASION_AND_CELLSPECIFIC_IMMUNE_RESPONSE	CCL4	CCL5	TGFB1	TRAF3	DDX58	IFNB1	IFNAR1	LAG3	IFITM1
WP_TARGET_OF_RAPAMYCIN_TOR_SIGNALING	http://www.gsea-msigdb.org/gsea/msigdb/cards/WP_TARGET_OF_RAPAMYCIN_TOR_SIGNALING	PRKAB1	RRAGA	PRKAG2	RAC1	ULK1	MLST8	FKBP1A	AKT1S1	MTOR	PRR5	AKT1
WP_PYRIMIDINE_METABOLISM	http://www.gsea-msigdb.org/gsea/msigdb/cards/WP_PYRIMIDINE_METABOLISM	TK1	POLE4	UCK1	UCKL1	POLD1	POLD2	POLE	DCTPP1	NT5M	CDA	NME2	NME3
WP_MIRNA_REGULATION_OF_DNA_DAMAGE_RESPONSE	http://www.gsea-msigdb.org/gsea/msigdb/cards/WP_MIRNA_REGULATION_OF_DNA_DAMAGE_RESPONSE	CDK4	CDKN1B	CASP9	E2F1	GADD45B	CCND3	BAX	SFN	BBC3	CDK1	RAD51
WP_DNA_DAMAGE_RESPONSE	http://www.gsea-msigdb.org/gsea/msigdb/cards/WP_DNA_DAMAGE_RESPONSE	CDK4	CDKN1B	CASP9	E2F1	GADD45B	CCND3	BAX	SFN	CDK1	BBC3	RAD51
WP_BREAST_CANCER_PATHWAY	http://www.gsea-msigdb.org/gsea/msigdb/cards/WP_BREAST_CANCER_PATHWAY	CSNK2B	SHC2	ARAF	NOTCH3	E2F1	GADD45B	AXIN1	AXIN2	FLT4	FZD3	WNT2	FZD8	FZD10	WNT10B	CDK4	TCF7L1	CTNNB1	APC2	DLL4	MTOR	AKT1	JUN	GRB2	BAK1	HEY1	LRP6	HEYL	WNT3A	SHC1	BAX	FZD2	RAD51
WP_JOUBERT_SYNDROME	http://www.gsea-msigdb.org/gsea/msigdb/cards/WP_JOUBERT_SYNDROME	PDE6D	RPGRIP1L	MYO5A	TMEM138	INPP5E	MTOR	PDE6G	TMEM67	CEP104	OFD1	KAT5	ARMC9
WP_NOTCH_SIGNALING_PATHWAY_NETPATH	http://www.gsea-msigdb.org/gsea/msigdb/cards/WP_NOTCH_SIGNALING_PATHWAY_NETPATH	HIF1A	DLL4	AKT1	NOTCH3	SRC	PTCRA	HEY1
WP_AMPACTIVATED_PROTEIN_KINASE_AMPK_SIGNALING	http://www.gsea-msigdb.org/gsea/msigdb/cards/WP_AMPACTIVATED_PROTEIN_KINASE_AMPK_SIGNALING	CPT1C	MTOR	AKT1	PRKAB1	ELAVL1	PRKAG2	ADRA1B
WP_WHITE_FAT_CELL_DIFFERENTIATION	http://www.gsea-msigdb.org/gsea/msigdb/cards/WP_WHITE_FAT_CELL_DIFFERENTIATION	WNT10B	RORA	TCF7L1	KLF4	CEBPA	KLF2
WP_DNA_MISMATCH_REPAIR	http://www.gsea-msigdb.org/gsea/msigdb/cards/WP_DNA_MISMATCH_REPAIR	PMS2	POLE4	RPA1	POLD1	POLD2	POLE
WP_ERBB_SIGNALING_PATHWAY	http://www.gsea-msigdb.org/gsea/msigdb/cards/WP_ERBB_SIGNALING_PATHWAY	SHC2	CDKN1B	ARAF	MTOR	AKT1	SRC	JUN	ABL2	GRB2	ELK1	SHC1	MAP2K7
WP_WNT_SIGNALING_PATHWAY_AND_PLURIPOTENCY	http://www.gsea-msigdb.org/gsea/msigdb/cards/WP_WNT_SIGNALING_PATHWAY_AND_PLURIPOTENCY	NKD2	AXIN1	AXIN2	CCND3	FZD3	WNT2	FZD4	FZD8	FZD10	WNT10B	TCF7L1	CTNNB1	JUN	PPP2CB	LRP6	WNT3A	FZD2
WP_HUMAN_THYROID_STIMULATING_HORMONE_TSH_SIGNALING_PATHWAY	http://www.gsea-msigdb.org/gsea/msigdb/cards/WP_HUMAN_THYROID_STIMULATING_HORMONE_TSH_SIGNALING_PATHWAY	RPS6KA1	CDK4	CDKN1B	MTOR	AKT1	E2F1	SRC	JUN	GNAI2	GNA12	CCND3	GNB1	SCRIB	MAP2K3
WP_16P112_PROXIMAL_DELETION_SYNDROME	http://www.gsea-msigdb.org/gsea/msigdb/cards/WP_16P112_PROXIMAL_DELETION_SYNDROME	SEZ6L2	CORO1A	CDIPT	MAZ	SPN	HIRIP3	PPP2CB	PPP4C	YPEL3	MAP2K3
WP_MECP2_AND_ASSOCIATED_RETT_SYNDROME	http://www.gsea-msigdb.org/gsea/msigdb/cards/WP_MECP2_AND_ASSOCIATED_RETT_SYNDROME	MAG	CNP	MTOR	AKT1	E2F1	MBP	POU3F2
WP_P53_TRANSCRIPTIONAL_GENE_NETWORK	http://www.gsea-msigdb.org/gsea/msigdb/cards/WP_P53_TRANSCRIPTIONAL_GENE_NETWORK	ERCC5	CPT1C	SIVA1	ULK1	GPX1	ALDH4A1	PRKAB1	ULBP1	BAX	BBC3	IRF5
WP_INTEGRATED_CANCER_PATHWAY	http://www.gsea-msigdb.org/gsea/msigdb/cards/WP_INTEGRATED_CANCER_PATHWAY	CDK4	POU2F1	SMAD2	BAX	CDKN1B	BBC3	CDK1	CASP9	PLK1	AKT1	E2F1
WP_AGERAGE_PATHWAY	http://www.gsea-msigdb.org/gsea/msigdb/cards/WP_AGERAGE_PATHWAY	DDOST	NOS3	HIF1A	CASP9	AKT1	SRC	MYD88	JUN	RAC1	SMAD2	RELA	SHC1	MMP13	INHBB
WP_WNTBETACATENIN_SIGNALING_PATHWAY_IN_LEUKEMIA	http://www.gsea-msigdb.org/gsea/msigdb/cards/WP_WNTBETACATENIN_SIGNALING_PATHWAY_IN_LEUKEMIA	AXIN2	CTNNB1	LRP6	JUP	AKT1
WP_NEURAL_CREST_DIFFERENTIATION	http://www.gsea-msigdb.org/gsea/msigdb/cards/WP_NEURAL_CREST_DIFFERENTIATION	NOTCH3	AXIN1	AXIN2	HDAC10	FZD3	ID1	TCF7L1	CTNNB1	DLL4	MBP	WNT3A	SNAI1
WP_CANONICAL_AND_NONCANONICAL_NOTCH_SIGNALING	http://www.gsea-msigdb.org/gsea/msigdb/cards/WP_CANONICAL_AND_NONCANONICAL_NOTCH_SIGNALING	HEY1	DLK1	DLL4	RRAS	NOTCH3
WP_LNCRNA_INVOLVEMENT_IN_CANONICAL_WNT_SIGNALING_AND_COLORECTAL_CANCER	http://www.gsea-msigdb.org/gsea/msigdb/cards/WP_LNCRNA_INVOLVEMENT_IN_CANONICAL_WNT_SIGNALING_AND_COLORECTAL_CANCER	CSNK2B	NKD2	SOX17	AXIN1	AXIN2	CCND3	FZD3	WNT2	FZD8	FZD10	WNT10B	TCF7L1	CTNNB1	APC2	JUN	LRP6	WNT3A	FZD2
WP_ANGIOPOIETIN_LIKE_PROTEIN_8_REGULATORY_PATHWAY	http://www.gsea-msigdb.org/gsea/msigdb/cards/WP_ANGIOPOIETIN_LIKE_PROTEIN_8_REGULATORY_PATHWAY	MAP3K11	RPS6KA1	SHC2	PRKAB1	PRKAG2	MLST8	MAPK12	MAP2K7	MAPK11	MAP2K3	FLOT1	RPS6KA4	MAP4K2	MAPK7	MTOR	AKT1	SHC1	GSK3A
WP_METAPATHWAY_BIOTRANSFORMATION_PHASE_I_AND_II	http://www.gsea-msigdb.org/gsea/msigdb/cards/WP_METAPATHWAY_BIOTRANSFORMATION_PHASE_I_AND_II	AKR1B1	CYP2S1	CYP27B1	FMO5	AKR7A2	CHST14	CHST2	GPX3	MGST2	GSTK1	GSTT2B	COMT	HS3ST3A1	NDST2	CYP26C1	CYP2F1
WP_SUDDEN_INFANT_DEATH_SYNDROME_SIDS_SUSCEPTIBILITY_PATHWAYS	http://www.gsea-msigdb.org/gsea/msigdb/cards/WP_SUDDEN_INFANT_DEATH_SYNDROME_SIDS_SUSCEPTIBILITY_PATHWAYS	ADCYAP1R1	TACR1	HIF1A	SNTA1	TPPP	RORA	POU3F2	KCNQ1	PRKACA	MIR3652	CTNNB1	YWHAQ	YWHAE	YWHAH	YWHAB	JUN	MAZ	VAMP2
WP_NEURODEGENERATION_WITH_BRAIN_IRON_ACCUMULATION_NBIA_SUBTYPES_PATHWAY	http://www.gsea-msigdb.org/gsea/msigdb/cards/WP_NEURODEGENERATION_WITH_BRAIN_IRON_ACCUMULATION_NBIA_SUBTYPES_PATHWAY	ATG10	COASY	ULK1	MLST8	WDR45	FTL	AKT1S1	MAP1LC3A	MTOR
WP_DNA_IRDAMAGE_AND_CELLULAR_RESPONSE_VIA_ATR	http://www.gsea-msigdb.org/gsea/msigdb/cards/WP_DNA_IRDAMAGE_AND_CELLULAR_RESPONSE_VIA_ATR	HUS1	RPA1	PLK1	E2F1	TRIM28	CDK1	RAD51
WP_PATHWAYS_REGULATING_HIPPO_SIGNALING	http://www.gsea-msigdb.org/gsea/msigdb/cards/WP_PATHWAYS_REGULATING_HIPPO_SIGNALING	PRKAB1	FLT4	PRKAG2	SMAD2	PRKACA	TEAD4	TCF7L1	YY1AP1	CTNNB1	CDH24	MTOR	GNAI2	RAC1
WP_REGUCALCIN_IN_PROXIMAL_TUBULE_EPITHELIAL_KIDNEY_CELLS	http://www.gsea-msigdb.org/gsea/msigdb/cards/WP_REGUCALCIN_IN_PROXIMAL_TUBULE_EPITHELIAL_KIDNEY_CELLS	TGFB1	BAK1	TNFRSF1A	SMAD2	RELA	BAX	CASP9	MTOR	AKT1
WP_PREIMPLANTATION_EMBRYO	http://www.gsea-msigdb.org/gsea/msigdb/cards/WP_PREIMPLANTATION_EMBRYO	TEAD4	TCF7L1	HMGA1	ESRRA	KLF4	AQP3	SIX3	HNRNPAB	ELAVL1	ZFP36
WP_AMINO_ACID_METABOLISM	http://www.gsea-msigdb.org/gsea/msigdb/cards/WP_AMINO_ACID_METABOLISM	ACO2	OGDH	MDH2	CS	GOT2	SRM	ACAA1	SDS	HADH	MPST
WP_FAS_LIGAND_FASL_PATHWAY_AND_STRESS_INDUCTION_OF_HEAT_SHOCK_PROTEINS_HSP_REGULATION	http://www.gsea-msigdb.org/gsea/msigdb/cards/WP_FAS_LIGAND_FASL_PATHWAY_AND_STRESS_INDUCTION_OF_HEAT_SHOCK_PROTEINS_HSP_REGULATION	SPTAN1	RIPK2	ACTG1	CASP9	ACTB	MAPKAPK3	JUN
WP_GABA_RECEPTOR_SIGNALING	http://www.gsea-msigdb.org/gsea/msigdb/cards/WP_GABA_RECEPTOR_SIGNALING	AP2S1	AP2A1	GABRA6	GABRA4	GABRQ	GPHN
WP_CILIOPATHIES	http://www.gsea-msigdb.org/gsea/msigdb/cards/WP_CILIOPATHIES	PDE6D	RPGRIP1L	ZMYND10	FLCN	TMEM138	RSPH4A	DNAAF5	AK7	CCNO	CEP83	KIZ	TMEM67	GLI2	INPP5E	PKD1L1	CEP104	OFD1	DNAAF3
WP_TCA_CYCLE_AKA_KREBS_OR_CITRIC_ACID_CYCLE	http://www.gsea-msigdb.org/gsea/msigdb/cards/WP_TCA_CYCLE_AKA_KREBS_OR_CITRIC_ACID_CYCLE	SDHC	MDH2	SDHD	CS	ACO2	OGDH
WP_GENES_RELATED_TO_PRIMARY_CILIUM_DEVELOPMENT_BASED_ON_CRISPR	http://www.gsea-msigdb.org/gsea/msigdb/cards/WP_GENES_RELATED_TO_PRIMARY_CILIUM_DEVELOPMENT_BASED_ON_CRISPR	RPGRIP1L	CEP83	KATNB1	HSPB11	TMEM67	INPP5E	CEP104	OFD1	ARMC9
WP_RAS_AND_BRADYKININ_PATHWAYS_IN_COVID19	http://www.gsea-msigdb.org/gsea/msigdb/cards/WP_RAS_AND_BRADYKININ_PATHWAYS_IN_COVID19	KLK1	KLKB1	SERPING1	NOS3	ACE
WP_MBDNF_AND_PROBDNF_REGULATION_OF_GABA_NEUROTRANSMISSION	http://www.gsea-msigdb.org/gsea/msigdb/cards/WP_MBDNF_AND_PROBDNF_REGULATION_OF_GABA_NEUROTRANSMISSION	SHC1	AP2A1	GABRA6	GABRA4	GABRQ
WP_INITIATION_OF_TRANSCRIPTION_AND_TRANSLATION_ELONGATION_AT_THE_HIV1_LTR	http://www.gsea-msigdb.org/gsea/msigdb/cards/WP_INITIATION_OF_TRANSCRIPTION_AND_TRANSLATION_ELONGATION_AT_THE_HIV1_LTR	NELFB	SUPT5H	NELFE	RELA	NELFA
WP_GLUCOCORTICOID_RECEPTOR_PATHWAY	http://www.gsea-msigdb.org/gsea/msigdb/cards/WP_GLUCOCORTICOID_RECEPTOR_PATHWAY	MIR7706	SRGN	JUN	GADD45B	ACKR3	MFGE8
WP_ECTODERM_DIFFERENTIATION	http://www.gsea-msigdb.org/gsea/msigdb/cards/WP_ECTODERM_DIFFERENTIATION	SPRY2	LY6E	EDA2R	KIFC3	GAS2L1	HDAC10	GLB1	PRKAG2	FZD4	FZD8	CLVS1	HMGB2	ARHGDIG	TCF7L1	CTNNB1	JUP
WP_GENOTOXICITY_PATHWAY	http://www.gsea-msigdb.org/gsea/msigdb/cards/WP_GENOTOXICITY_PATHWAY	PHLDA3	SERTAD1	PRKAB1	NLRX1	IKBIP	AEN
WP_BDNFTRKB_SIGNALING	http://www.gsea-msigdb.org/gsea/msigdb/cards/WP_BDNFTRKB_SIGNALING	RPS6KA1	GRB2	SHC1	MTOR	AKT1
WP_EPO_RECEPTOR_SIGNALING	http://www.gsea-msigdb.org/gsea/msigdb/cards/WP_EPO_RECEPTOR_SIGNALING	SOCS1	GRB2	SHC1	AKT1	SRC
WP_REGULATION_OF_MICROTUBULE_CYTOSKELETON	http://www.gsea-msigdb.org/gsea/msigdb/cards/WP_REGULATION_OF_MICROTUBULE_CYTOSKELETON	MAP1B	TPPP	CLASP1	AKT1	SRC	RAC1	AURKB	WNT3A	SPRED1	CDK1	PRKACA	LIMK1
WP_NEUROINFLAMMATION	http://www.gsea-msigdb.org/gsea/msigdb/cards/WP_NEUROINFLAMMATION	RELA	MTOR	MT-CO1	MT-CO2	JUN
WP_IL2_SIGNALING_PATHWAY	http://www.gsea-msigdb.org/gsea/msigdb/cards/WP_IL2_SIGNALING_PATHWAY	JAK3	GRB2	SHC1	AKT1	JUN
WP_PEPTIDE_GPCRS	http://www.gsea-msigdb.org/gsea/msigdb/cards/WP_PEPTIDE_GPCRS	TACR1	NTSR1	EDNRA	CXCR3	FPR1	C5AR1	ATP8A1	OPRL1	CX3CR1	ACKR1
WP_OXIDATION_BY_CYTOCHROME_P450	http://www.gsea-msigdb.org/gsea/msigdb/cards/WP_OXIDATION_BY_CYTOCHROME_P450	CYP2S1	CYP27B1	CYP26C1	CYP2F1	POR	CYB5R3
WP_TRIACYLGLYCERIDE_SYNTHESIS	http://www.gsea-msigdb.org/gsea/msigdb/cards/WP_TRIACYLGLYCERIDE_SYNTHESIS	DGAT1	PLPP1	LIPF	AGPAT4	MOGAT3	AGPAT1	PLPP3
WP_GLUTATHIONE_METABOLISM	http://www.gsea-msigdb.org/gsea/msigdb/cards/WP_GLUTATHIONE_METABOLISM	ANPEP	GPX3	GPX1	GGT5	GCLC
WP_NUCLEOTIDEBINDING_OLIGOMERIZATION_DOMAIN_NOD_PATHWAY	http://www.gsea-msigdb.org/gsea/msigdb/cards/WP_NUCLEOTIDEBINDING_OLIGOMERIZATION_DOMAIN_NOD_PATHWAY	PYCARD	RIPK2	RAC1	RELA	CASP9
WP_CORTICOTROPINRELEASING_HORMONE_SIGNALING_PATHWAY	http://www.gsea-msigdb.org/gsea/msigdb/cards/WP_CORTICOTROPINRELEASING_HORMONE_SIGNALING_PATHWAY	TGFB1	HSD3B1	CTNNB1	GNB2	NCOA2	NOS3	CRHBP	JUNB	JUP	CASP9	AKT1	ARRB2	GNAI2	ELK1	TRIM28	RELA	GNB1
WP_GPCRS_OTHER	http://www.gsea-msigdb.org/gsea/msigdb/cards/WP_GPCRS_OTHER	HTR1F	NTSR1	OR1E1	EDNRA	CXCR3	OR3A3	ACKR1
WP_NUCLEAR_RECEPTORS	http://www.gsea-msigdb.org/gsea/msigdb/cards/WP_NUCLEAR_RECEPTORS	RXRG	RXRB	RORA	ESRRA	NR1H2
WP_VITAMIN_A_AND_CAROTENOID_METABOLISM	http://www.gsea-msigdb.org/gsea/msigdb/cards/WP_VITAMIN_A_AND_CAROTENOID_METABOLISM	DGAT1	RXRG	RXRB	NPC1L1	RDH12
WP_HOSTPATHOGEN_INTERACTION_OF_HUMAN_CORONA_VIRUSES_MAPK_SIGNALING	http://www.gsea-msigdb.org/gsea/msigdb/cards/WP_HOSTPATHOGEN_INTERACTION_OF_HUMAN_CORONA_VIRUSES_MAPK_SIGNALING	MAP3K11	RPS6KA1	IFITM3	MAPK12	IFITM2	JUNB	MAP2K7	MAPK11	MAP2K3	JUN	IFITM1
WP_CYTOSOLIC_DNASENSING_PATHWAY	http://www.gsea-msigdb.org/gsea/msigdb/cards/WP_CYTOSOLIC_DNASENSING_PATHWAY	CCL4	CCL5	PYCARD	IKBKE	NFKBIB	DDX58	NLRX1	IFNB1	RELA
WP_PROSTAGLANDIN_SYNTHESIS_AND_REGULATION	http://www.gsea-msigdb.org/gsea/msigdb/cards/WP_PROSTAGLANDIN_SYNTHESIS_AND_REGULATION	AKR1B1	SCGB1A1	EDNRA	PTGDS	S100A10	PTGDR	TBXA2R
WP_NEOVASCULARISATION_PROCESSES	http://www.gsea-msigdb.org/gsea/msigdb/cards/WP_NEOVASCULARISATION_PROCESSES	TGFB1	SMAD9	FLT4	HIF1A	SMAD2	RELA	RELB	DLL4	AKT1	NOTCH3
WP_ESC_PLURIPOTENCY_PATHWAYS	http://www.gsea-msigdb.org/gsea/msigdb/cards/WP_ESC_PLURIPOTENCY_PATHWAYS	ARAF	AXIN1	FZD3	FZD4	WNT2	FZD8	MAPK12	MAP2K3	WNT10B	SMAD7	SMAD9	CTNNB1	MAPK7	MTOR	AKT1	JUN	GRB2	ELK1	LIFR	LRP6	WNT3A	FZD2
WP_THE_INFLUENCE_OF_LAMINOPATHIES_ON_WNT_SIGNALING	http://www.gsea-msigdb.org/gsea/msigdb/cards/WP_THE_INFLUENCE_OF_LAMINOPATHIES_ON_WNT_SIGNALING	AXIN1	WNT10B	TCF7L1	CTNNB1	CEBPA
WP_PDGFRBETA_PATHWAY	http://www.gsea-msigdb.org/gsea/msigdb/cards/WP_PDGFRBETA_PATHWAY	GRB2	ELK1	SRF	SHC1	JUN
WP_REGULATION_OF_TOLLLIKE_RECEPTOR_SIGNALING_PATHWAY	http://www.gsea-msigdb.org/gsea/msigdb/cards/WP_REGULATION_OF_TOLLLIKE_RECEPTOR_SIGNALING_PATHWAY	SOCS1	CCL4	CCL5	MYD88	TRAF3	IKBKE	CD14	TICAM1	SIGIRR	PELI3	MAPK12	MLST8	RELA	MAP2K7	IRF5	MAPK11	IRAK3	MAP2K3	TAB1	PLK1	AKT1	JUN	PELI2	MIR98	IFNB1	IFNAR1	RAC1	IL12B	SQSTM1
WP_ALPHA_6_BETA_4_SIGNALING_PATHWAY	http://www.gsea-msigdb.org/gsea/msigdb/cards/WP_ALPHA_6_BETA_4_SIGNALING_PATHWAY	GRB2	LAMA1	RAC1	SHC1	MTOR	AKT1	SRC
WP_SLEEP_REGULATION	http://www.gsea-msigdb.org/gsea/msigdb/cards/WP_SLEEP_REGULATION	AHCY	PTGDS	CST3	ADA	PTGDR
WP_HIPPOMERLIN_SIGNALING_DYSREGULATION	http://www.gsea-msigdb.org/gsea/msigdb/cards/WP_HIPPOMERLIN_SIGNALING_DYSREGULATION	RBX1	FLT4	PRKACA	TEAD4	YY1AP1	CTNNB1	ITGA5	ITGA7	CDH24	PPP1R14A	ITGAV	PPP1R12A	MIR98
WP_ARYL_HYDROCARBON_RECEPTOR_NETPATH	http://www.gsea-msigdb.org/gsea/msigdb/cards/WP_ARYL_HYDROCARBON_RECEPTOR_NETPATH	GCLC	RELA	CDKN1B	SRC	E2F1
WP_CELL_MIGRATION_AND_INVASION_THROUGH_P75NTR	http://www.gsea-msigdb.org/gsea/msigdb/cards/WP_CELL_MIGRATION_AND_INVASION_THROUGH_P75NTR	ARF1	RAC1	EFNA2	AKT1	EFNB3	EFNB1	JUN
WP_IL17_SIGNALING_PATHWAY	http://www.gsea-msigdb.org/gsea/msigdb/cards/WP_IL17_SIGNALING_PATHWAY	TRAF3	NFKBIB	IL17C	RELA	AKT1
WP_3Q29_COPY_NUMBER_VARIATION_SYNDROME	http://www.gsea-msigdb.org/gsea/msigdb/cards/WP_3Q29_COPY_NUMBER_VARIATION_SYNDROME	MAD2L1BP	NCBP2	TGFB1	SDHAP1	HIF1A	NRROS	UBXN7	AKT1	RABL2B	JUN	GRB2	LINC01063	HAMP	ZNF76	MCRS1
WP_PATHWAYS_IN_CLEAR_CELL_RENAL_CELL_CARCINOMA	http://www.gsea-msigdb.org/gsea/msigdb/cards/WP_PATHWAYS_IN_CLEAR_CELL_RENAL_CELL_CARCINOMA	TGFB1	EFCAB3	HIF1A	MTOR	AKT1	SDSL	SDS	MLST8	AKT1S1	SQSTM1
WP_PARKINSONS_DISEASE_PATHWAY	http://www.gsea-msigdb.org/gsea/msigdb/cards/WP_PARKINSONS_DISEASE_PATHWAY	CASP2	UBA1	MIR370	PINK1	UBE2J2	CASP9	HTRA2	UBE2J1	MAPK12	MAPK11
WP_TGFBETA_SIGNALING_PATHWAY	http://www.gsea-msigdb.org/gsea/msigdb/cards/WP_TGFBETA_SIGNALING_PATHWAY	TGFB1	RBX1	UBE2I	AXIN1	E2F4	SMAD2	MAP2K3	SMAD7	TAB1	TERT	JUNB	AKT1	SRC	JUN	GRB2	RAC1	SHC1	CDK1
WP_MAMMARY_GLAND_DEVELOPMENT_PATHWAY_PREGNANCY_AND_LACTATION_STAGE_3_OF_4	http://www.gsea-msigdb.org/gsea/msigdb/cards/WP_MAMMARY_GLAND_DEVELOPMENT_PATHWAY_PREGNANCY_AND_LACTATION_STAGE_3_OF_4	TTC9	BCL2L1	GJB2	TPM3	CEBPA
WP_EGFEGFR_SIGNALING_PATHWAY	http://www.gsea-msigdb.org/gsea/msigdb/cards/WP_EGFEGFR_SIGNALING_PATHWAY	RPS6KA1	SPRY2	NOS3	CFL1	E2F1	ARHGEF1	MT-CO2	PLD2	MAPK7	AP2A1	MTOR	AKT1	SRC	JUN	SH2D2A	DOK2	GRB2	ELK1	RAC1	SHC1	RIN1	AP2S1	CSK
WP_THE_HUMAN_IMMUNE_RESPONSE_TO_TUBERCULOSIS	http://www.gsea-msigdb.org/gsea/msigdb/cards/WP_THE_HUMAN_IMMUNE_RESPONSE_TO_TUBERCULOSIS	SOCS1	TYK2	IFI35	IFNAR1	IFITM1
WP_TCELL_ANTIGEN_RECEPTOR_TCR_PATHWAY_DURING_STAPHYLOCOCCUS_AUREUS_INFECTION	http://www.gsea-msigdb.org/gsea/msigdb/cards/WP_TCELL_ANTIGEN_RECEPTOR_TCR_PATHWAY_DURING_STAPHYLOCOCCUS_AUREUS_INFECTION	CDK4	LAT	CARD11	RRAS	AKT1	JUN	GRB2	MAP2K7
WP_THYMIC_STROMAL_LYMPHOPOIETIN_TSLP_SIGNALING_PATHWAY	http://www.gsea-msigdb.org/gsea/msigdb/cards/WP_THYMIC_STROMAL_LYMPHOPOIETIN_TSLP_SIGNALING_PATHWAY	PI4K2A	RELA	RELB	FES	MTOR	AKT1	SRC
WP_WNT_SIGNALING_PATHWAY_NETPATH	http://www.gsea-msigdb.org/gsea/msigdb/cards/WP_WNT_SIGNALING_PATHWAY_NETPATH	PI4K2A	CTNNB1	CSNK1D	MTOR	AKT1	ARRB2	AXIN1	AXIN2	RAC1	LRP6	GSK3A
WP_PI3KAKT_SIGNALING_PATHWAY	http://www.gsea-msigdb.org/gsea/msigdb/cards/WP_PI3KAKT_SIGNALING_PATHWAY	GNG11	BCL2L1	PKN3	LAMA1	GNB2	NOS3	GH2	FLT4	FLT3LG	RELA	C8orf44-SGK3	PHLPP2	CDK4	ITGA5	ITGA7	EFNA2	CDKN1B	CASP9	MTOR	ITGAV	IFNB1	IFNAR1	PPP2CB	RAC1	COL6A1	COL9A2	G6PC3	IBSP	CCND3	MLST8	MIR3652	PKN1	JAK3	AKT1	PGF	CSF3	GRB2	LAMC3	GNB1
WP_FRAGILE_X_SYNDROME	http://www.gsea-msigdb.org/gsea/msigdb/cards/WP_FRAGILE_X_SYNDROME	ARAF	TECR	AGAP2	TELO2	MLST8	AKT1S1	PRKACA	GPHN	MAP1B	DLGAP3	SLC16A1	AP2A1	MTOR	AKT1	SRC	SH3GL1	GRB2	SHC1	MIR5004	AP2S1
WP_APOPTOSISRELATED_NETWORK_DUE_TO_ALTERED_NOTCH3_IN_OVARIAN_CANCER	http://www.gsea-msigdb.org/gsea/msigdb/cards/WP_APOPTOSISRELATED_NETWORK_DUE_TO_ALTERED_NOTCH3_IN_OVARIAN_CANCER	PKN1	SMAD7	RIPK2	CDKN1B	BCL3	AKT1	AXIN1	GCLC	SQSTM1
WP_LUNG_FIBROSIS	http://www.gsea-msigdb.org/gsea/msigdb/cards/WP_LUNG_FIBROSIS	CCL4	CCL5	SERPINA1	TGFB1	SMAD7	HMOX1	TERT	CSF3	TIMP1	IL12B
WP_COMPLEMENT_AND_COAGULATION_CASCADES	http://www.gsea-msigdb.org/gsea/msigdb/cards/WP_COMPLEMENT_AND_COAGULATION_CASCADES	SERPINA1	SERPING1	C1QA	C1QB	C1QC	F10	C5AR1	CPB2	CFD	KLKB1
WP_FERROPTOSIS	http://www.gsea-msigdb.org/gsea/msigdb/cards/WP_FERROPTOSIS	HMOX1	MAP1LC3B	GCLC	PCBP1	ACSL4	FTL	MAP1LC3A	SAT2
WP_CAMKK2_PATHWAY	http://www.gsea-msigdb.org/gsea/msigdb/cards/WP_CAMKK2_PATHWAY	HMOX1	RAC1	RELA	STIM1	MAP1LC3A	MTOR	SQSTM1
WP_GLYCEROLIPIDS_AND_GLYCEROPHOSPHOLIPIDS	http://www.gsea-msigdb.org/gsea/msigdb/cards/WP_GLYCEROLIPIDS_AND_GLYCEROPHOSPHOLIPIDS	DGAT1	AGPAT4	DGKZ	PCYT2	PEMT	CDIPT
WP_PHOTODYNAMIC_THERAPYINDUCED_HIF1_SURVIVAL_SIGNALING	http://www.gsea-msigdb.org/gsea/msigdb/cards/WP_PHOTODYNAMIC_THERAPYINDUCED_HIF1_SURVIVAL_SIGNALING	HIF1AN	BCL2L1	BAK1	HIF1A	SLC16A1	BAX
WP_PHYSIOLOGICAL_AND_PATHOLOGICAL_HYPERTROPHY_OF_THE_HEART	http://www.gsea-msigdb.org/gsea/msigdb/cards/WP_PHYSIOLOGICAL_AND_PATHOLOGICAL_HYPERTROPHY_OF_THE_HEART	RAC1	LIFR	MAPK11	MAP2K3	JUN
WP_GPCRS_CLASS_A_RHODOPSINLIKE	http://www.gsea-msigdb.org/gsea/msigdb/cards/WP_GPCRS_CLASS_A_RHODOPSINLIKE	P2RY6	EDNRA	P2RY2	TBXA2R	OR2B3	OPRL1	PTGDR	ADRA1B	FPR1	APLNR	HTR1F	OR1E1	OR1E2	CXCR3	OR3A3	ACKR3	HCAR3	CX3CR1	NTSR1
WP_CARDIAC_HYPERTROPHIC_RESPONSE	http://www.gsea-msigdb.org/gsea/msigdb/cards/WP_CARDIAC_HYPERTROPHIC_RESPONSE	TGFB1	TNFRSF1A	MAPK7	MTOR	AKT1	IKBKE	RAC1	MAP2K7	MAP2K3
WP_IL5_SIGNALING_PATHWAY	http://www.gsea-msigdb.org/gsea/msigdb/cards/WP_IL5_SIGNALING_PATHWAY	RPS6KA1	GRB2	ELK1	SPRED1	SHC1	GSK3A	AKT1	JUN
WP_ENDODERM_DIFFERENTIATION	http://www.gsea-msigdb.org/gsea/msigdb/cards/WP_ENDODERM_DIFFERENTIATION	TGFB1	SOX17	ELAVL1	SMAD2	GLI2	MAP2K3	TCF7L1	CTNNB1	GRHL2	ONECUT1	JARID2	PBX3	ZBTB17	DUSP2	PAF1
WP_SPINAL_CORD_INJURY	http://www.gsea-msigdb.org/gsea/msigdb/cards/WP_SPINAL_CORD_INJURY	TGFB1	GDNF	AQP1	TACR1	FKBP1A	E2F1	MAG	NTN1	CDK4	C1QB	CDKN1B	MBP	ZFP36	RAC1	RTN4R	CDK1
WP_ARRHYTHMOGENIC_RIGHT_VENTRICULAR_CARDIOMYOPATHY	http://www.gsea-msigdb.org/gsea/msigdb/cards/WP_ARRHYTHMOGENIC_RIGHT_VENTRICULAR_CARDIOMYOPATHY	TCF7L1	CTNNB1	ITGA5	ITGA7	JUP	ITGAV	ACTB	ACTG1	MIR935
WP_MESODERMAL_COMMITMENT_PATHWAY	http://www.gsea-msigdb.org/gsea/msigdb/cards/WP_MESODERMAL_COMMITMENT_PATHWAY	SOX17	AXIN1	AXIN2	FZD4	SMAD2	FZD8	AMH	PRKACA	TCF7L1	GRHL2	KLF4	JARID2	MIR302C	SRF	TRIM28	WNT3A	PBX3	SNAI1
WP_RANKLRANK_RECEPTOR_ACTIVATOR_OF_NFKB_LIGAND_SIGNALING_PATHWAY	http://www.gsea-msigdb.org/gsea/msigdb/cards/WP_RANKLRANK_RECEPTOR_ACTIVATOR_OF_NFKB_LIGAND_SIGNALING_PATHWAY	TAB1	ACP5	MTOR	AKT1	SRC	JUN	TRAF3	SPI1	RAC1	RELA	RELB	MAP2K7	SQSTM1
WP_NCRNAS_INVOLVED_IN_WNT_SIGNALING_IN_HEPATOCELLULAR_CARCINOMA	http://www.gsea-msigdb.org/gsea/msigdb/cards/WP_NCRNAS_INVOLVED_IN_WNT_SIGNALING_IN_HEPATOCELLULAR_CARCINOMA	CSNK2B	WNT10B	NKD2	TCF7L1	CTNNB1	SOX17	KLF4	JUN	AXIN1	ELAVL1	CCND3	FZD3	LRP6	WNT3A	WNT2	FZD8	FZD2	FZD10
WP_EICOSANOID_METABOLISM_VIA_CYCLO_OXYGENASES_COX	http://www.gsea-msigdb.org/gsea/msigdb/cards/WP_EICOSANOID_METABOLISM_VIA_CYCLO_OXYGENASES_COX	AKR1B1	ACAA1	PTGDS	PTGDR	TBXA2R
WP_TRANSLATION_INHIBITORS_IN_CHRONICALLY_ACTIVATED_PDGFRA_CELLS	http://www.gsea-msigdb.org/gsea/msigdb/cards/WP_TRANSLATION_INHIBITORS_IN_CHRONICALLY_ACTIVATED_PDGFRA_CELLS	EIF4G3	RPS6KA1	RPS6KA4	MAP2K7	MTOR	PRKACA	AKT1	MAP2K3
WP_22Q112_COPY_NUMBER_VARIATION_SYNDROME	http://www.gsea-msigdb.org/gsea/msigdb/cards/WP_22Q112_COPY_NUMBER_VARIATION_SYNDROME	NPRL3	THAP7	RBX1	ALDH4A1	ZDHHC8	TMEM191A	CLDN3	NPRL2	SCARF2	CLDN5	MAG	SLC7A4	RANGAP1	PLK1	TXNRD2	EMC10	HIRIP3	SLC25A1	COMT	DGCR6L	MED15	SRF	CYP26C1	RTN4R
WP_MATRIX_METALLOPROTEINASES	http://www.gsea-msigdb.org/gsea/msigdb/cards/WP_MATRIX_METALLOPROTEINASES	MMP15	MMP16	TIMP1	MMP13	MMP28	MMP10
WP_ANDROGEN_RECEPTOR_SIGNALING_PATHWAY	http://www.gsea-msigdb.org/gsea/msigdb/cards/WP_ANDROGEN_RECEPTOR_SIGNALING_PATHWAY	PLPP1	KLK3	CTNNB1	NCOA2	RNF4	ZNF318	AKT1	UBE2I	SRC	JUN	RAC1	RELA	KAT5
WP_HAIR_FOLLICLE_DEVELOPMENT_CYTODIFFERENTIATION_PART_3_OF_3	http://www.gsea-msigdb.org/gsea/msigdb/cards/WP_HAIR_FOLLICLE_DEVELOPMENT_CYTODIFFERENTIATION_PART_3_OF_3	S100A4	TGFB1	CTNNB1	JUN	BMP6	CD200	CD34	GLI2
WP_WNT_SIGNALING	http://www.gsea-msigdb.org/gsea/msigdb/cards/WP_WNT_SIGNALING	CSNK2B	NKD2	SOX17	AXIN1	CCND3	FZD3	WNT2	FZD8	FZD10	WNT10B	TCF7L1	CTNNB1	JUN	DAAM2	RAC1	LRP6	WNT3A	FZD2
WP_REGULATORY_CIRCUITS_OF_THE_STAT3_SIGNALING_PATHWAY	http://www.gsea-msigdb.org/gsea/msigdb/cards/WP_REGULATORY_CIRCUITS_OF_THE_STAT3_SIGNALING_PATHWAY	JAK3	TYK2	MAPK7	MTOR	SRC	IFNAR1	TRIM28	LIFR	MAPK12	MLST8	DUSP2	AKT1S1	IL10RB	MAPK11
WP_ESTROGEN_SIGNALING_PATHWAY	http://www.gsea-msigdb.org/gsea/msigdb/cards/WP_ESTROGEN_SIGNALING_PATHWAY	GNB1	ELK1	PRKACA	AKT1	JUN
WP_KIT_RECEPTOR_SIGNALING_PATHWAY	http://www.gsea-msigdb.org/gsea/msigdb/cards/WP_KIT_RECEPTOR_SIGNALING_PATHWAY	SOCS1	RPS6KA1	TBX2	JUNB	AKT1	SRC	GRB7	DOK1	GRB2	SHC1	SNAI1
WP_NETRINUNC5B_SIGNALING_PATHWAY	http://www.gsea-msigdb.org/gsea/msigdb/cards/WP_NETRINUNC5B_SIGNALING_PATHWAY	NTN1	SELE	AKT1	SRC	JUN	AGAP2	ROBO4	RAC1
WP_FATTY_ACID_BETA_OXIDATION	http://www.gsea-msigdb.org/gsea/msigdb/cards/WP_FATTY_ACID_BETA_OXIDATION	LIPF	ECHS1	ACADS	ACADVL	HADH	ACSL4
WP_VITAMIN_D_RECEPTOR_PATHWAY	http://www.gsea-msigdb.org/gsea/msigdb/cards/WP_VITAMIN_D_RECEPTOR_PATHWAY	TGFB1	CYP2S1	HIF1A	CYP27B1	DACT2	CD14	BMP6	SERPINB1	CD200	ID1	ADRA1B	CAMP	IRF5	SEMA3B	S100A4	MYO9B	KLF4	CDKN2D	JUNB	CDKN1B	LGALS9	CEBPA	PNOC
WP_WNT_SIGNALING_IN_KIDNEY_DISEASE	http://www.gsea-msigdb.org/gsea/msigdb/cards/WP_WNT_SIGNALING_IN_KIDNEY_DISEASE	WNT10B	CTNNB1	FZD3	LRP6	WNT3A	WNT2	FZD4	FZD8	FZD2
WP_GLYCEROPHOSPHOLIPID_BIOSYNTHETIC_PATHWAY	http://www.gsea-msigdb.org/gsea/msigdb/cards/WP_GLYCEROPHOSPHOLIPID_BIOSYNTHETIC_PATHWAY	PI4K2A	MOGAT3	PCYT2	PEMT	CDIPT
WP_PPAR_SIGNALING_PATHWAY	http://www.gsea-msigdb.org/gsea/msigdb/cards/WP_PPAR_SIGNALING_PATHWAY	CPT1C	RXRG	RXRB	ILK	ACAA1	ACSL4
WP_HEMATOPOIETIC_STEM_CELL_DIFFERENTIATION	http://www.gsea-msigdb.org/gsea/msigdb/cards/WP_HEMATOPOIETIC_STEM_CELL_DIFFERENTIATION	GATA1	LYL1	KLF1	CSF3	SPI1	NCKAP1L	IRF5	CD34
WP_ADIPOGENESIS	http://www.gsea-msigdb.org/gsea/msigdb/cards/WP_ADIPOGENESIS	SOCS1	TGFB1	NCOA2	HIF1A	DLK1	PLIN2	E2F1	GADD45B	RXRG	RORA	E2F4	TRIB3	LPIN3	WNT10B	CTNNB1	HMGA1	ID3	CFD	LIFR	CEBPA
WP_OXYSTEROLS_DERIVED_FROM_CHOLESTEROL	http://www.gsea-msigdb.org/gsea/msigdb/cards/WP_OXYSTEROLS_DERIVED_FROM_CHOLESTEROL	IL17C	NR1H2	ACOT1	ACOT2	HSD3B7	ACOT7
WP_GENES_INVOLVED_IN_MALE_INFERTILITY	http://www.gsea-msigdb.org/gsea/msigdb/cards/WP_GENES_INVOLVED_IN_MALE_INFERTILITY	NOS3	PMS2	POLG	SOD3	PEMT	HMGA1	TCN2	PEX10	GPX1	TMEM132E
WP_NRF2ARE_REGULATION	http://www.gsea-msigdb.org/gsea/msigdb/cards/WP_NRF2ARE_REGULATION	HMOX1	GCLC	RBX1	SRC	KEAP1
WP_METABOLIC_REPROGRAMMING_IN_COLON_CANCER	http://www.gsea-msigdb.org/gsea/msigdb/cards/WP_METABOLIC_REPROGRAMMING_IN_COLON_CANCER	RPIA	PGAM1	SLC1A5	MDH2	TKT	GOT2	ACO2
WP_MIRNA_REGULATION_OF_PROSTATE_CANCER_SIGNALING_PATHWAYS	http://www.gsea-msigdb.org/gsea/msigdb/cards/WP_MIRNA_REGULATION_OF_PROSTATE_CANCER_SIGNALING_PATHWAYS	KLK3	CTNNB1	CDKN1B	CASP9	MTOR	MIR337	GRB2
WP_LEPTIN_SIGNALING_PATHWAY	http://www.gsea-msigdb.org/gsea/msigdb/cards/WP_LEPTIN_SIGNALING_PATHWAY	RPS6KA1	BCL2L1	NOS3	MTOR	AKT1	SRC	GRB2	ELK1	RAC1	SHC1	RELA	BAX	GSK3A
WP_EXTRACELLULAR_VESICLEMEDIATED_SIGNALING_IN_RECIPIENT_CELLS	http://www.gsea-msigdb.org/gsea/msigdb/cards/WP_EXTRACELLULAR_VESICLEMEDIATED_SIGNALING_IN_RECIPIENT_CELLS	AXIN1	TGFB1	CTNNB1	WNT3A	MFGE8	SMAD2	MTOR	AKT1
WP_B_CELL_RECEPTOR_SIGNALING_PATHWAY	http://www.gsea-msigdb.org/gsea/msigdb/cards/WP_B_CELL_RECEPTOR_SIGNALING_PATHWAY	RPS6KA1	CARD11	RELA	PIP5K1C	AKT1	JUN	RAC2	GRB2	ELK1	RAC1	SHC1	PTPN18	GSK3A
WP_NUCLEAR_RECEPTORS_METAPATHWAY	http://www.gsea-msigdb.org/gsea/msigdb/cards/WP_NUCLEAR_RECEPTORS_METAPATHWAY	SLC2A6	SERPINA1	GADD45B	ACAA1	CDK4	SLC39A1	CDKN1B	SRC	IL12B	CDK1	TGFB1	MIR7706	NCOA2	SRGN	SLC7A5	ACKR3	GCLC	SOD3	MFGE8	HMOX1	SLC39A3	KEAP1	GPX3	JUNB	FTL	MGST2	JUN	SLC2A13	ALDH3A1	BAX	SQSTM1
WP_THERMOGENESIS	http://www.gsea-msigdb.org/gsea/msigdb/cards/WP_THERMOGENESIS	RPS6KA1	ADCY7	PRKAB1	KDM3B	PRKAG2	SIRT6	MLST8	MAPK12	ACSL4	AKT1S1	PRKACA	MAPK11	MAP2K3	CPT1C	MTOR	ACTB	GRB2	ACTG1
WP_PHOTODYNAMIC_THERAPYINDUCED_AP1_SURVIVAL_SIGNALING	http://www.gsea-msigdb.org/gsea/msigdb/cards/WP_PHOTODYNAMIC_THERAPYINDUCED_AP1_SURVIVAL_SIGNALING	BCL2L1	TNFRSF1A	JUNB	BCL3	JUN	BAK1	ELK1	MAPK12	BAX	MAP2K7	MAPK11	MAP2K3
WP_OSTEOBLAST_DIFFERENTIATION	http://www.gsea-msigdb.org/gsea/msigdb/cards/WP_OSTEOBLAST_DIFFERENTIATION	NOTCH3	FZD3	FZD4	WNT2	FZD8	MAPK12	MAPK11	FZD10	GLI2	WNT10B	SMAD9	CTNNB1	MAPK7	DLL4	HEY1	LRP6	WNT3A	FZD2
WP_DNA_IRDOUBLE_STRAND_BREAKS_DSBS_AND_CELLULAR_RESPONSE_VIA_ATM	http://www.gsea-msigdb.org/gsea/msigdb/cards/WP_DNA_IRDOUBLE_STRAND_BREAKS_DSBS_AND_CELLULAR_RESPONSE_VIA_ATM	CASP9	E2F1	BAK1	TRIM28	BAX	KAT5	RAD51
WP_RETINOBLASTOMA_GENE_IN_CANCER	http://www.gsea-msigdb.org/gsea/msigdb/cards/WP_RETINOBLASTOMA_GENE_IN_CANCER	CDK4	FANCG	SUV39H1	CDKN1B	RPA1	POLE	E2F1	CCND3	RABIF	CDK1	HMGB2	CDT1
WP_CILIARY_LANDSCAPE	http://www.gsea-msigdb.org/gsea/msigdb/cards/WP_CILIARY_LANDSCAPE	COPS7B	CEP170P1	HSPB11	RHBDD2	ARHGDIA	CTNNB1	RAB3IL1	RAC1	EXOC6B	NUDC	AAR2	SNRPB2	DNPEP	TIPRL	GLB1	ERF	DYNC1H1	NUP88	ECHS1	HTRA2	RABEP2	RBM14	NDUFA9	SSNA1
WP_DNA_REPLICATION	http://www.gsea-msigdb.org/gsea/msigdb/cards/WP_DNA_REPLICATION	CDT1	RPA1	POLD1	POLD2	POLE
WP_IL1_SIGNALING_PATHWAY	http://www.gsea-msigdb.org/gsea/msigdb/cards/WP_IL1_SIGNALING_PATHWAY	TAB1	ECSIT	AKT1	MYD88	JUN	NFKBIB	PELI2	RELA	MAP2K7	SQSTM1	IRAK3	MAP2K3
WP_IL4_SIGNALING_PATHWAY	http://www.gsea-msigdb.org/gsea/msigdb/cards/WP_IL4_SIGNALING_PATHWAY	SOCS1	JAK3	TYK2	FES	AKT1	DOK2	GRB2	ELK1	RELA	SHC1	CEBPA	MAPK11
WP_TCELL_ANTIGEN_RECEPTOR_TCR_SIGNALING_PATHWAY	http://www.gsea-msigdb.org/gsea/msigdb/cards/WP_TCELL_ANTIGEN_RECEPTOR_TCR_SIGNALING_PATHWAY	TGFB1	SH2B3	RIPK2	LAT	WAS	CARD11	AKT1	JUN	GRB2	RELA	SHC1
WP_INTERFERON_TYPE_I_SIGNALING_PATHWAYS	http://www.gsea-msigdb.org/gsea/msigdb/cards/WP_INTERFERON_TYPE_I_SIGNALING_PATHWAYS	SOCS1	TYK2	RPS6KA4	MTOR	IFNAR1	RAC1	MLST8	MAP2K3
WP_VITAMIN_B12_METABOLISM	http://www.gsea-msigdb.org/gsea/msigdb/cards/WP_VITAMIN_B12_METABOLISM	CCL5	HBB	TCN2	ABCA1	SOD3	RELA
WP_PROTEASOME_DEGRADATION	http://www.gsea-msigdb.org/gsea/msigdb/cards/WP_PROTEASOME_DEGRADATION	UBA1	PSMA1	PSME3	PSMB4	PSMB6	PSME2	PSMB1
WP_GASTRIN_SIGNALING_PATHWAY	http://www.gsea-msigdb.org/gsea/msigdb/cards/WP_GASTRIN_SIGNALING_PATHWAY	MAP3K11	BCL2L1	ARRB2	ELAVL1	RELA	KAT5	PRKACA	CTNNB1	KLF4	CDKN1B	MTOR	AKT1	SRC	JUN	GRB2	ELK1	RAC1	SHC1
WP_PATHOGENIC_ESCHERICHIA_COLI_INFECTION	http://www.gsea-msigdb.org/gsea/msigdb/cards/WP_PATHOGENIC_ESCHERICHIA_COLI_INFECTION	ARPC4	TUBB	CTNNB1	YWHAQ	WAS	TUBB4A	ARPC2	ACTB	TUBA1C	CD14	ACTG1	TUBA4A
WP_SARS_CORONAVIRUS_AND_INNATE_IMMUNITY	http://www.gsea-msigdb.org/gsea/msigdb/cards/WP_SARS_CORONAVIRUS_AND_INNATE_IMMUNITY	IKBKE	TRAF3	DDX58	TICAM1	IFNB1	IFNAR1	TYK2
WP_SIGNALING_PATHWAYS_IN_GLIOBLASTOMA	http://www.gsea-msigdb.org/gsea/msigdb/cards/WP_SIGNALING_PATHWAYS_IN_GLIOBLASTOMA	CDK4	SPRY2	CDKN1B	ARAF	AKT1	SRC	E2F1	GRB2	MAP2K7	MAP2K3
WP_MAPK_CASCADE	http://www.gsea-msigdb.org/gsea/msigdb/cards/WP_MAPK_CASCADE	SIPA1	MBP	GRB2	ELK1	MAPK12	MAP2K7	ARAF	RRAS	JUN	MAP2K3
WP_APOPTOSIS	http://www.gsea-msigdb.org/gsea/msigdb/cards/WP_APOPTOSIS	BCL2L1	CASP2	TNFRSF1A	TNFRSF1B	CASP9	AKT1	JUN	TRAF3	NFKBIB	BAK1	RELA	BAX	BBC3	BOK	IRF5
WP_TYPE_2_PAPILLARY_RENAL_CELL_CARCINOMA	http://www.gsea-msigdb.org/gsea/msigdb/cards/WP_TYPE_2_PAPILLARY_RENAL_CELL_CARCINOMA	TGFB1	RBX1	HIF1A	TFE3	TFEB	PRCC
WP_G13_SIGNALING_PATHWAY	http://www.gsea-msigdb.org/gsea/msigdb/cards/WP_G13_SIGNALING_PATHWAY	PKN1	ARHGDIG	PFN1	RAC1	WAS	ARHGEF1	CFL1	LIMK1
WP_SMALL_CELL_LUNG_CANCER	http://www.gsea-msigdb.org/gsea/msigdb/cards/WP_SMALL_CELL_LUNG_CANCER	BCL2L1	LAMA1	E2F1	GADD45B	TRAF3	RXRG	RXRB	RELA	CDK4	CDKN1B	CASP9	ITGAV	AKT1	NFKBIB	CKS1B	LAMC3	BAK1	BAX	ZBTB17
WP_PRIMARY_FOCAL_SEGMENTAL_GLOMERULOSCLEROSIS_FSGS	http://www.gsea-msigdb.org/gsea/msigdb/cards/WP_PRIMARY_FOCAL_SEGMENTAL_GLOMERULOSCLEROSIS_FSGS	TGFB1	CTNNB1	YWHAQ	CDKN1B	ITGAV	AKT1	ILK	VCL	KRT8	LRP6
WP_G1_TO_S_CELL_CYCLE_CONTROL	http://www.gsea-msigdb.org/gsea/msigdb/cards/WP_G1_TO_S_CELL_CYCLE_CONTROL	CDK4	CDKN2D	CDKN1B	RPA1	POLE	E2F1	CCND3	CDK1
WP_GDNFRET_SIGNALLING_AXIS	http://www.gsea-msigdb.org/gsea/msigdb/cards/WP_GDNFRET_SIGNALLING_AXIS	SOX17	SALL1	GDNF	CTNNB1	HSPB11
WP_ENDOMETRIAL_CANCER	http://www.gsea-msigdb.org/gsea/msigdb/cards/WP_ENDOMETRIAL_CANCER	TCF7L1	CTNNB1	APC2	ARAF	CASP9	AKT1	GADD45B	AXIN1	AXIN2	GRB2	ILK	BAK1	ELK1	BAX
WP_MITOCHONDRIAL_COMPLEX_I_ASSEMBLY_MODEL_OXPHOS_SYSTEM	http://www.gsea-msigdb.org/gsea/msigdb/cards/WP_MITOCHONDRIAL_COMPLEX_I_ASSEMBLY_MODEL_OXPHOS_SYSTEM	NDUFA3	NDUFS6	NDUFAF3	MT-ND6	ECSIT	MT-ND1	MT-ND2	MT-ND4	MT-ND4L	NDUFB3	TMEM186	NDUFB11
WP_HEAD_AND_NECK_SQUAMOUS_CELL_CARCINOMA	http://www.gsea-msigdb.org/gsea/msigdb/cards/WP_HEAD_AND_NECK_SQUAMOUS_CELL_CARCINOMA	CDK4	CTNNB1	KEAP1	TERT	FKBP1A	MTOR	AKT1	E2F1	TRAF3	MLST8	RELA
WP_THIAMINE_METABOLIC_PATHWAYS	http://www.gsea-msigdb.org/gsea/msigdb/cards/WP_THIAMINE_METABOLIC_PATHWAYS	TPK1	BCKDK	SLC19A3	SLC25A19	TKT	OGDH
WP_PROLACTIN_SIGNALING_PATHWAY	http://www.gsea-msigdb.org/gsea/msigdb/cards/WP_PROLACTIN_SIGNALING_PATHWAY	SOCS1	MTOR	AKT1	CTSD	SRC	JUN	NFKBIB	AGAP2	GRB2	ELK1	RAC1	RELA	SHC1
WP_ENDOCHONDRAL_OSSIFICATION_WITH_SKELETAL_DYSPLASIAS	http://www.gsea-msigdb.org/gsea/msigdb/cards/WP_ENDOCHONDRAL_OSSIFICATION_WITH_SKELETAL_DYSPLASIAS	TGFB1	CST5	AKT1	BMP6	MMP13	PRKACA
WP_INTERLEUKIN11_SIGNALING_PATHWAY	http://www.gsea-msigdb.org/gsea/msigdb/cards/WP_INTERLEUKIN11_SIGNALING_PATHWAY	TGFB1	RPS6KA1	IBSP	GRB2	TYK2	RELA	FES	AKT1	SRC
WP_CIRCADIAN_RHYTHM_RELATED_GENES	http://www.gsea-msigdb.org/gsea/msigdb/cards/WP_CIRCADIAN_RHYTHM_RELATED_GENES	CSNK1D	CST3	SIX3	OPRL1	RELB	PTGDS	CLDN4	CDK4	SUV39H1	NAGLU	AHCY	NCOA2	MTA1	RORA	CCAR2	MAGEL2	ID3	SUV39H2	JUN	HNRNPD	ADA
WP_ENDOCHONDRAL_OSSIFICATION	http://www.gsea-msigdb.org/gsea/msigdb/cards/WP_ENDOCHONDRAL_OSSIFICATION	TGFB1	CST5	AKT1	BMP6	MMP13	PRKACA
WP_OXIDATIVE_STRESS	http://www.gsea-msigdb.org/gsea/msigdb/cards/WP_OXIDATIVE_STRESS	TXN2	HMOX1	GCLC	SOD3	JUNB	GPX3	GPX1	TXNRD2
WP_CELL_CYCLE	http://www.gsea-msigdb.org/gsea/msigdb/cards/WP_CELL_CYCLE	TGFB1	RBX1	ANAPC11	E2F1	GADD45B	PKMYT1	E2F4	CCND3	SMAD2	ANAPC7	CDK4	YWHAQ	YWHAE	YWHAH	CDKN2D	CDKN1B	PLK1	YWHAB	ZBTB17	SFN	CDK1
WP_ARYL_HYDROCARBON_RECEPTOR_PATHWAY	http://www.gsea-msigdb.org/gsea/msigdb/cards/WP_ARYL_HYDROCARBON_RECEPTOR_PATHWAY	TGFB1	ALDH3A1	IL12B	BAX	SLC7A5	JUNB	CDKN1B	SRC	JUN
WP_MITOCHONDRIAL_CIV_ASSEMBLY	http://www.gsea-msigdb.org/gsea/msigdb/cards/WP_MITOCHONDRIAL_CIV_ASSEMBLY	COA3	COX14	COX5A	SCO2	COX8A	PNKD	SURF1	MT-CO1	MT-CO2	CMC1
WP_FOCAL_ADHESION	http://www.gsea-msigdb.org/gsea/msigdb/cards/WP_FOCAL_ADHESION	LAMA1	PIP5K1C	CTNNB1	ITGA5	ITGA7	ITGAV	ACTB	SRC	PPP1R12A	RAC2	RAC3	ELK1	ACTG1	MYL9	RAC1	PARVB	SHC2	IBSP	CCND3	MYLPF	COL5A3	AKT1	PGF	JUN	ILK	GRB2	LAMC3	VCL	SHC1
WP_HOSTPATHOGEN_INTERACTION_OF_HUMAN_CORONA_VIRUSES_APOPTOSIS	http://www.gsea-msigdb.org/gsea/msigdb/cards/WP_HOSTPATHOGEN_INTERACTION_OF_HUMAN_CORONA_VIRUSES_APOPTOSIS	MAPK12	BAX	BBC3	BCL2L1	CASP9	MAPK11	AKT1
WP_BASE_EXCISION_REPAIR	http://www.gsea-msigdb.org/gsea/msigdb/cards/WP_BASE_EXCISION_REPAIR	MPG	POLE4	APEX2	POLD1	POLD2	POLE	NTHL1
WP_PDGF_PATHWAY	http://www.gsea-msigdb.org/gsea/msigdb/cards/WP_PDGF_PATHWAY	GRB2	ELK1	SRF	RAC1	SHC1	MT-CO2	SRC	JUN
WP_ONCOSTATIN_M_SIGNALING_PATHWAY	http://www.gsea-msigdb.org/gsea/msigdb/cards/WP_ONCOSTATIN_M_SIGNALING_PATHWAY	JAK3	TYK2	HIF1A	JUNB	CDKN1B	MTOR	AKT1	SRC	GRB2	LIFR	RELA	SHC1	MMP13
WP_NOTCH_SIGNALING	http://www.gsea-msigdb.org/gsea/msigdb/cards/WP_NOTCH_SIGNALING	PTCRA	INPP5K	LFNG	MFNG	RBPJL	DLL4	RFNG	NOTCH3
WP_BRAINDERIVED_NEUROTROPHIC_FACTOR_BDNF_SIGNALING_PATHWAY	http://www.gsea-msigdb.org/gsea/msigdb/cards/WP_BRAINDERIVED_NEUROTROPHIC_FACTOR_BDNF_SIGNALING_PATHWAY	RPS6KA1	FRS3	SHC2	CFL1	RELA	RHOG	CTNNB1	MAPK7	MTOR	AKT1	SRC	JUN	GRB2	ELK1	RAC1	SHC1	SQSTM1
WP_INTEGRATED_BREAST_CANCER_PATHWAY	http://www.gsea-msigdb.org/gsea/msigdb/cards/WP_INTEGRATED_BREAST_CANCER_PATHWAY	USP21	CSNK1D	ARAF	RRAS	E2F1	SMAD2	SMAD7	CDK4	CTNNB1	TAB1	CASP9	MTOR	PLK1	AKT1	JUN	RPP38	BAK1	RAC1	BAX	GSK3A	RAD51
WP_MET_IN_TYPE_1_PAPILLARY_RENAL_CELL_CARCINOMA	http://www.gsea-msigdb.org/gsea/msigdb/cards/WP_MET_IN_TYPE_1_PAPILLARY_RENAL_CELL_CARCINOMA	JAK3	ARAF	AKT1	PRCC	SRC	JUN	GRB2	RAC1	TFE3
WP_THE_OVERLAP_BETWEEN_SIGNAL_TRANSDUCTION_PATHWAYS_THAT_CONTRIBUTE_TO_A_RANGE_OF_LMNA_LAMINOPATHIES	http://www.gsea-msigdb.org/gsea/msigdb/cards/WP_THE_OVERLAP_BETWEEN_SIGNAL_TRANSDUCTION_PATHWAYS_THAT_CONTRIBUTE_TO_A_RANGE_OF_LMNA_LAMINOPATHIES	TGFB1	WNT10B	CDK4	TCF7L1	CTNNB1	JUNB	ACTB	E2F1	AXIN1	SMAD2	CEBPA
WP_DEVELOPMENT_OF_URETERIC_COLLECTION_SYSTEM	http://www.gsea-msigdb.org/gsea/msigdb/cards/WP_DEVELOPMENT_OF_URETERIC_COLLECTION_SYSTEM	SALL1	GDNF	SIX2	CTNNB1	ILK	GLI2
WP_PHOTODYNAMIC_THERAPYINDUCED_NFE2L2_NRF2_SURVIVAL_SIGNALING	http://www.gsea-msigdb.org/gsea/msigdb/cards/WP_PHOTODYNAMIC_THERAPYINDUCED_NFE2L2_NRF2_SURVIVAL_SIGNALING	MAPK12	HMOX1	ABCC6	MAPK11	GCLC	JUN	KEAP1
WP_SARSCOV2_MITOCHONDRIAL_INTERACTIONS	http://www.gsea-msigdb.org/gsea/msigdb/cards/WP_SARSCOV2_MITOCHONDRIAL_INTERACTIONS	IKBKE	TRAF3	DDX58	NLRX1	TICAM1	ACE	ECSIT
WP_HOSTPATHOGEN_INTERACTION_OF_HUMAN_CORONA_VIRUSES_INTERFERON_INDUCTION	http://www.gsea-msigdb.org/gsea/msigdb/cards/WP_HOSTPATHOGEN_INTERACTION_OF_HUMAN_CORONA_VIRUSES_INTERFERON_INDUCTION	IKBKE	TRAF3	DDX58	TICAM1	IFNAR1	TYK2	MYD88	JUN
WP_OXIDATIVE_DAMAGE	http://www.gsea-msigdb.org/gsea/msigdb/cards/WP_OXIDATIVE_DAMAGE	TRAF3	BAK1	C1QA	C1QB	C1QC	TNFRSF1B	CDKN1B	CASP9	C5AR1
WP_TGFB_SIGNALING_IN_THYROID_CELLS_FOR_EPITHELIALMESENCHYMAL_TRANSITION	http://www.gsea-msigdb.org/gsea/msigdb/cards/WP_TGFB_SIGNALING_IN_THYROID_CELLS_FOR_EPITHELIALMESENCHYMAL_TRANSITION	SMAD2	ID1	TGFB1	AKT1	SNAI1
WP_RAS_SIGNALING	http://www.gsea-msigdb.org/gsea/msigdb/cards/WP_RAS_SIGNALING	GNG11	BCL2L1	GNB2	PLA1A	SHC2	RRAS	ABL2	FLT4	RELA	PRKACA	PLD2	LAT	PLA2G2C	AKT1	RAC2	RAC3	GRB2	ELK1	RASA4	RAC1	SHC1	MIR5004	RIN1	GNB1	PLA2G4E
WP_TNF_ALPHA_SIGNALING_PATHWAY	http://www.gsea-msigdb.org/gsea/msigdb/cards/WP_TNF_ALPHA_SIGNALING_PATHWAY	CYBA	BCL2L1	TAB1	TNFRSF1A	TNFRSF1B	MAP4K2	SELE	CASP9	AKT1	PLK1	JUN	NFKBIB	GRB2	RAC1	BAX	MAP2K7	MAP2K3
WP_CHROMOSOMAL_AND_MICROSATELLITE_INSTABILITY_IN_COLORECTAL_CANCER	http://www.gsea-msigdb.org/gsea/msigdb/cards/WP_CHROMOSOMAL_AND_MICROSATELLITE_INSTABILITY_IN_COLORECTAL_CANCER	NTN1	TGFB1	TCF7L1	CTNNB1	APC2	ARAF	CASP9	AKT1	JUN	GADD45B	RAC2	RAC3	AXIN1	AXIN2	BAK1	RAC1	SMAD2	BAX	BBC3
WP_NONSMALL_CELL_LUNG_CANCER	http://www.gsea-msigdb.org/gsea/msigdb/cards/WP_NONSMALL_CELL_LUNG_CANCER	CDK4	JAK3	ARAF	CASP9	AKT1	E2F1	GADD45B	RXRG	RXRB	GRB2	BAK1	BAX
WP_HUMAN_COMPLEMENT_SYSTEM	http://www.gsea-msigdb.org/gsea/msigdb/cards/WP_HUMAN_COMPLEMENT_SYSTEM	WAS	SELE	F10	ARRB2	ICAM2	IBSP	KLKB1	PRKACA	SERPING1	FPR1	C5AR1	GNAI2	CFD	GNA15
WP_ONE_CARBON_METABOLISM_AND_RELATED_PATHWAYS	http://www.gsea-msigdb.org/gsea/msigdb/cards/WP_ONE_CARBON_METABOLISM_AND_RELATED_PATHWAYS	GPX3	GPX1	PCYT2	GCLC	SOD3	BCAT2	PEMT
WP_NAD_METABOLISM_IN_ONCOGENEINDUCED_SENESCENCE_AND_MITOCHONDRIAL_DYSFUNCTIONASSOCIATED_SENESCENCE	http://www.gsea-msigdb.org/gsea/msigdb/cards/WP_NAD_METABOLISM_IN_ONCOGENEINDUCED_SENESCENCE_AND_MITOCHONDRIAL_DYSFUNCTIONASSOCIATED_SENESCENCE	SIRT2	SCO2	RELA	MDH2	ELAVL1	HMGA1	GOT2
WP_EGFR_TYROSINE_KINASE_INHIBITOR_RESISTANCE	http://www.gsea-msigdb.org/gsea/msigdb/cards/WP_EGFR_TYROSINE_KINASE_INHIBITOR_RESISTANCE	BCL2L1	SHC2	ARAF	MTOR	AKT1	RRAS	SRC	GRB2	SHC1	BAX
WP_HEDGEHOG_SIGNALING_PATHWAY	http://www.gsea-msigdb.org/gsea/msigdb/cards/WP_HEDGEHOG_SIGNALING_PATHWAY	CSNK1D	PRKACA	ARRB2	DHH	GLI2
WP_MICRORNAS_IN_CARDIOMYOCYTE_HYPERTROPHY	http://www.gsea-msigdb.org/gsea/msigdb/cards/WP_MICRORNAS_IN_CARDIOMYOCYTE_HYPERTROPHY	TGFB1	IKBKE	MAP2K7	MAP2K3	CTNNB1	TAB1	MAPK7	MTOR	AKT1	RAC1	LRP6	WNT3A	FZD2
WP_THYROID_HORMONES_PRODUCTION_AND_THEIR_PERIPHERAL_DOWNSTREAM_SIGNALLING_EFFECTS	http://www.gsea-msigdb.org/gsea/msigdb/cards/WP_THYROID_HORMONES_PRODUCTION_AND_THEIR_PERIPHERAL_DOWNSTREAM_SIGNALLING_EFFECTS	CTNNB1	CASP9	MTOR	ITGAV	SRC	KDM3B	GRB2	SIRT6	MLST8	TG	AKT1S1	PRKACA	MAPKAPK3
WP_ALLOGRAFT_REJECTION	http://www.gsea-msigdb.org/gsea/msigdb/cards/WP_ALLOGRAFT_REJECTION	TGFB1	GDNF	C1QA	C1QB	C1QC	CCL19	CCL21	CASP9	HLA-DOA	IL12B
WP_NONGENOMIC_ACTIONS_OF_125_DIHYDROXYVITAMIN_D3	http://www.gsea-msigdb.org/gsea/msigdb/cards/WP_NONGENOMIC_ACTIONS_OF_125_DIHYDROXYVITAMIN_D3	TYK2	TNFRSF1A	MAPK7	CYP27B1	IFI27L2	JUN	RXRG	RXRB	MAPK12	RELB	CAMP	MAPK11
WP_ASSOCIATION_BETWEEN_PHYSICOCHEMICAL_FEATURES_AND_TOXICITY_ASSOCIATED_PATHWAYS	http://www.gsea-msigdb.org/gsea/msigdb/cards/WP_ASSOCIATION_BETWEEN_PHYSICOCHEMICAL_FEATURES_AND_TOXICITY_ASSOCIATED_PATHWAYS	CTNNB1	PFN1	GPX1	CDKN1B	AKT1	SRC	JUN	AXIN1	GRB2	ELK1	FZD3	FZD4	FZD8	SHC1	FZD2	FZD10
WP_HEPATITIS_B_INFECTION	http://www.gsea-msigdb.org/gsea/msigdb/cards/WP_HEPATITIS_B_INFECTION	TGFB1	TYK2	ARAF	MYD88	TRAF3	IKBKE	TICAM1	SMAD2	MAPK12	RELA	MAP2K7	MAPK11	MAP2K3	JAK3	YWHAQ	TAB1	CASP9	AKT1	YWHAB	SRC	JUN	DDX58	HSPG2	GRB2	IFNB1	ELK1	IFNAR1	BAX
WP_IL3_SIGNALING_PATHWAY	http://www.gsea-msigdb.org/gsea/msigdb/cards/WP_IL3_SIGNALING_PATHWAY	TGFB1	BCL2L1	YWHAQ	AKT1	YWHAB	SRC	JUN	GRB2	SHC1	PRKACA
WP_AMYOTROPHIC_LATERAL_SCLEROSIS_ALS	http://www.gsea-msigdb.org/gsea/msigdb/cards/WP_AMYOTROPHIC_LATERAL_SCLEROSIS_ALS	BCL2L1	TOMM40	RAC1	TNFRSF1A	CST3	BAX	GPX1	CASP9
WP_REGULATION_OF_APOPTOSIS_BY_PARATHYROID_HORMONERELATED_PROTEIN	http://www.gsea-msigdb.org/gsea/msigdb/cards/WP_REGULATION_OF_APOPTOSIS_BY_PARATHYROID_HORMONERELATED_PROTEIN	BAX	GSK3A	BCL2L1	BAK1	BOK	AKT1
WP_HEPATITIS_C_AND_HEPATOCELLULAR_CARCINOMA	http://www.gsea-msigdb.org/gsea/msigdb/cards/WP_HEPATITIS_C_AND_HEPATOCELLULAR_CARCINOMA	TGFB1	BCL2L1	HIF1A	CASP9	AKT1	JUN	GRB2	RAC1
WP_MAMMALIAN_DISORDER_OF_SEXUAL_DEVELOPMENT	http://www.gsea-msigdb.org/gsea/msigdb/cards/WP_MAMMALIAN_DISORDER_OF_SEXUAL_DEVELOPMENT	CTNNB1	PTGDS	AMH	MAPK11	DHH
WP_STRUCTURAL_PATHWAY_OF_INTERLEUKIN_1_IL1	http://www.gsea-msigdb.org/gsea/msigdb/cards/WP_STRUCTURAL_PATHWAY_OF_INTERLEUKIN_1_IL1	TAB1	MYD88	MBP	NFKBIB	ELK1	RELA	MAP2K7	MAPK11	MAP2K3
WP_ALZHEIMERS_DISEASE	http://www.gsea-msigdb.org/gsea/msigdb/cards/WP_ALZHEIMERS_DISEASE	MIR769	MIR199B	ATP2A3	MIR1307	CAPN1	TNFRSF1A	CASP9	MIR329-2	MIR9-1
WP_TYROBP_CAUSAL_NETWORK	http://www.gsea-msigdb.org/gsea/msigdb/cards/WP_TYROBP_CAUSAL_NETWORK	CXCL16	SLC1A5	PYCARD	RPS6KA1	SH2B3	C1QC	NPC2	TNFRSF1B	LYL1	NRROS	LGALS9C	CYTL1	GPX1	TCIRG1	NCKAP1L	LGALS9B	TYROBP	CAPG
WP_MELANOMA	http://www.gsea-msigdb.org/gsea/msigdb/cards/WP_MELANOMA	CDK4	SHC2	ARAF	AKT1	E2F1	GADD45B	GRB2	BAK1	ELK1	VCL	RAC1	BAX
WP_MIRNAS_INVOLVEMENT_IN_THE_IMMUNE_RESPONSE_IN_SEPSIS	http://www.gsea-msigdb.org/gsea/msigdb/cards/WP_MIRNAS_INVOLVEMENT_IN_THE_IMMUNE_RESPONSE_IN_SEPSIS	CCL4	TAB1	MYD88	TRAF3	RELA	RELB	MIR223	MIR9-1	IRF5
WP_MECHANOREGULATION_AND_PATHOLOGY_OF_YAPTAZ_VIA_HIPPO_AND_NONHIPPO_MECHANISMS	http://www.gsea-msigdb.org/gsea/msigdb/cards/WP_MECHANOREGULATION_AND_PATHOLOGY_OF_YAPTAZ_VIA_HIPPO_AND_NONHIPPO_MECHANISMS	TEAD4	YY1AP1	CTNNB1	ACTG1	YWHAQ	MAP4K2	SGMS1	ACTB	SRC
WP_ENVELOPE_PROTEINS_AND_THEIR_POTENTIAL_ROLES_IN_EDMD_PHYSIOPATHOLOGY	http://www.gsea-msigdb.org/gsea/msigdb/cards/WP_ENVELOPE_PROTEINS_AND_THEIR_POTENTIAL_ROLES_IN_EDMD_PHYSIOPATHOLOGY	TGFB1	ADCY7	YY1AP1	GRB2	SRF	SMAD2	CFL1	BANF1
WP_CHEMOKINE_SIGNALING_PATHWAY	http://www.gsea-msigdb.org/gsea/msigdb/cards/WP_CHEMOKINE_SIGNALING_PATHWAY	CCL4	CCL5	GNG11	ADCY7	GNB2	SHC2	CCL19	CCL21	WAS	CXCR3	ARRB2	RELA	CX3CR1	CXCL16	JAK3	AKT1	CCL26	RAC2	NFKBIB	GNAI2	GRB2	DOCK2	RAC1	SHC1	GNB1	CSK
WP_TLR4_SIGNALING_AND_TOLERANCE	http://www.gsea-msigdb.org/gsea/msigdb/cards/WP_TLR4_SIGNALING_AND_TOLERANCE	IKBKE	TRAF3	TICAM1	IFNB1	TAB1	IRAK3	MYD88
WP_THE_EFFECT_OF_PROGERIN_ON_THE_INVOLVED_GENES_IN_HUTCHINSONGILFORD_PROGERIA_SYNDROME	http://www.gsea-msigdb.org/gsea/msigdb/cards/WP_THE_EFFECT_OF_PROGERIN_ON_THE_INVOLVED_GENES_IN_HUTCHINSONGILFORD_PROGERIA_SYNDROME	INPP5K	MTA1	SUV39H1	MBD2	E2F1	MBD3
WP_STING_PATHWAY_IN_KAWASAKILIKE_DISEASE_AND_COVID19	http://www.gsea-msigdb.org/gsea/msigdb/cards/WP_STING_PATHWAY_IN_KAWASAKILIKE_DISEASE_AND_COVID19	IKBKE	RELA	GSDMD	NLRX1	IFNB1
WP_VIRAL_ACUTE_MYOCARDITIS	http://www.gsea-msigdb.org/gsea/msigdb/cards/WP_VIRAL_ACUTE_MYOCARDITIS	SOCS1	PYCARD	TGFB1	BCL2L1	CASP2	CASP9	AKT1	ACTB	SRC	RAC2	RAC3	ABL2	TICAM1	ILK	PTCRA	KRT8	IL12B	BAX	CHRAC1
WP_TOLLLIKE_RECEPTOR_SIGNALING_PATHWAY	http://www.gsea-msigdb.org/gsea/msigdb/cards/WP_TOLLLIKE_RECEPTOR_SIGNALING_PATHWAY	CCL4	CCL5	MYD88	TRAF3	IKBKE	CD14	TICAM1	MAPK12	RELA	MAP2K7	IRF5	MAPK11	MAP2K3	TAB1	AKT1	JUN	NFKBIB	IFNB1	IFNAR1	RAC1	IL12B
WP_SIGNAL_TRANSDUCTION_THROUGH_IL1R	http://www.gsea-msigdb.org/gsea/msigdb/cards/WP_SIGNAL_TRANSDUCTION_THROUGH_IL1R	TGFB1	IFNB1	TAB1	RELA	ECSIT	IRAK3	MYD88	MAP2K3	JUN
WP_NONALCOHOLIC_FATTY_LIVER_DISEASE	http://www.gsea-msigdb.org/gsea/msigdb/cards/WP_NONALCOHOLIC_FATTY_LIVER_DISEASE	MAP3K11	NDUFA3	TGFB1	NDUFA11	NDUFS6	COX8A	COX7A1	PRKAB1	PRKAG2	NDUFS7	NDUFB11	COX5A	RELA	MT-CYB	BBC3	MT-CO1	MT-CO2	SDHC	SMAD7	SDHD	UQCR11	MLX	TNFRSF1A	UQCRHL	AKT1	JUN	NDUFB3	BAK1	RAC1	NDUFA9	CEBPA	BAX	GSK3A
WP_SELENIUM_MICRONUTRIENT_NETWORK	http://www.gsea-msigdb.org/gsea/msigdb/cards/WP_SELENIUM_MICRONUTRIENT_NETWORK	HBB	ABCA1	GPX3	GPX1	TXNRD2	MSRB1	SOD3	RELA
WP_FIBRIN_COMPLEMENT_RECEPTOR_3_SIGNALING_PATHWAY	http://www.gsea-msigdb.org/gsea/msigdb/cards/WP_FIBRIN_COMPLEMENT_RECEPTOR_3_SIGNALING_PATHWAY	CD14	TICAM1	IFNB1	IL12B	TYROBP	AKT1	SRC	MYD88
WP_TYPE_I_INTERFERON_INDUCTION_AND_SIGNALING_DURING_SARSCOV2_INFECTION	http://www.gsea-msigdb.org/gsea/msigdb/cards/WP_TYPE_I_INTERFERON_INDUCTION_AND_SIGNALING_DURING_SARSCOV2_INFECTION	IKBKE	TRAF3	IFNAR1	TYK2	MYD88	JUN
WP_MYOMETRIAL_RELAXATION_AND_CONTRACTION_PATHWAYS	http://www.gsea-msigdb.org/gsea/msigdb/cards/WP_MYOMETRIAL_RELAXATION_AND_CONTRACTION_PATHWAYS	GNG11	ADCY7	GNB2	DGKZ	NOS3	RGS16	IGFBP6	ATP2A3	IGFBP4	RAMP2	RAMP3	ARRB2	ACKR3	PRKACA	YWHAQ	YWHAE	YWHAH	ACTB	YWHAB	JUN	ACTG1	GNB1	SFN	RGS19
WP_DNA_DAMAGE_RESPONSE_ONLY_ATM_DEPENDENT	http://www.gsea-msigdb.org/gsea/msigdb/cards/WP_DNA_DAMAGE_RESPONSE_ONLY_ATM_DEPENDENT	TGFB1	AXIN1	CCND3	WNT2	BBC3	WNT10B	TCF7L1	CTNNB1	CDKN1B	AKT1	JUN	RAC2	RAC3	GRB2	BAK1	RAC1	WNT3A	SHC1	BAX
WP_INSULIN_SIGNALING	http://www.gsea-msigdb.org/gsea/msigdb/cards/WP_INSULIN_SIGNALING	SOCS1	MAP3K11	RPS6KA1	EHD1	SHC2	ARHGAP33	ARF1	TRIB3	MAPK12	MAP2K7	MAPK11	STXBP2	MAP2K3	FLOT1	RPS6KA4	MAP4K2	MAPK7	MTOR	AKT1	JUN	RAC2	GRB2	ELK1	SRF	VAMP2	RAC1	SHC1	GSK3A
WP_IL6_SIGNALING_PATHWAY	http://www.gsea-msigdb.org/gsea/msigdb/cards/WP_IL6_SIGNALING_PATHWAY	GRB2	BCL2L1	RAC1	TYK2	TIMP1	SHC1	JUNB	AKT1
WP_APOPTOSIS_MODULATION_AND_SIGNALING	http://www.gsea-msigdb.org/gsea/msigdb/cards/WP_APOPTOSIS_MODULATION_AND_SIGNALING	BCL2L1	CASP2	TNFRSF1A	TNFRSF1B	CASP9	MYD88	JUN	TRAF3	HTRA2	BAK1	PEA15	BAX	BBC3	BOK
WP_TNF_RELATED_WEAK_INDUCER_OF_APOPTOSIS_TWEAK_SIGNALING_PATHWAY	http://www.gsea-msigdb.org/gsea/msigdb/cards/WP_TNF_RELATED_WEAK_INDUCER_OF_APOPTOSIS_TWEAK_SIGNALING_PATHWAY	TRAF3	CCL5	NFKBIB	CTNNB1	RAC1	RELA	RELB	TNFSF12	AKT1	JUN
WP_MICROGLIA_PATHOGEN_PHAGOCYTOSIS_PATHWAY	http://www.gsea-msigdb.org/gsea/msigdb/cards/WP_MICROGLIA_PATHOGEN_PHAGOCYTOSIS_PATHWAY	RAC2	RAC3	CYBA	C1QA	C1QB	C1QC	LAT	RAC1	NCKAP1L	TYROBP
WP_STEROL_REGULATORY_ELEMENTBINDING_PROTEINS_SREBP_SIGNALLING	http://www.gsea-msigdb.org/gsea/msigdb/cards/WP_STEROL_REGULATORY_ELEMENTBINDING_PROTEINS_SREBP_SIGNALLING	NR1H2	MTOR	AKT1	SCAP	PRKAB1	MED15	PRKAG2	GSK3A	CAMP	PRKACA
WP_TGFBETA_RECEPTOR_SIGNALING	http://www.gsea-msigdb.org/gsea/msigdb/cards/WP_TGFBETA_RECEPTOR_SIGNALING	TGFB1	SMAD7	SMAD9	CTNNB1	FKBP1A	JUN	SMAD2	ENG	TFE3
WP_NOVEL_INTRACELLULAR_COMPONENTS_OF_RIGILIKE_RECEPTOR_RLR_PATHWAY	http://www.gsea-msigdb.org/gsea/msigdb/cards/WP_NOVEL_INTRACELLULAR_COMPONENTS_OF_RIGILIKE_RECEPTOR_RLR_PATHWAY	PIN1	TRAF3	IKBKE	NFKBIB	DDX58	NLRX1	IFNB1	MAPK12	RELA	MAPK11
WP_INTEGRINMEDIATED_CELL_ADHESION	http://www.gsea-msigdb.org/gsea/msigdb/cards/WP_INTEGRINMEDIATED_CELL_ADHESION	ARAF	MAPK12	CAPN1	MAP2K3	ITGA5	ITGA7	MAPK7	ITGAV	AKT1	CAPN5	SRC	RAC2	RAC3	GRB2	ILK	VCL	RAC1	SHC1	CSK
WP_PANCREATIC_ADENOCARCINOMA_PATHWAY	http://www.gsea-msigdb.org/gsea/msigdb/cards/WP_PANCREATIC_ADENOCARCINOMA_PATHWAY	TGFB1	CDK4	BCL2L1	CASP9	ARAF	MTOR	AKT1	E2F1	GADD45B	RAC2	RAC3	BAK1	RAC1	SMAD2	RELA	BAX	RAD51
WP_CALCIUM_REGULATION_IN_THE_CARDIAC_CELL	http://www.gsea-msigdb.org/gsea/msigdb/cards/WP_CALCIUM_REGULATION_IN_THE_CARDIAC_CELL	KCNJ3	GNG11	GJA4	ADCY7	GNB2	GJB2	RGS16	FKBP1A	ATP2A3	ARRB2	ADRA1B	PRKACA	YWHAQ	PLN	YWHAE	YWHAH	YWHAB	GNAI2	GJC2	GNB1	SFN	RGS19
WP_NUCLEOTIDE_METABOLISM	http://www.gsea-msigdb.org/gsea/msigdb/cards/WP_NUCLEOTIDE_METABOLISM	POLD1	NME2	SRM	POLG	OAZ1
WP_IL18_SIGNALING_PATHWAY	http://www.gsea-msigdb.org/gsea/msigdb/cards/WP_IL18_SIGNALING_PATHWAY	CCL4	CCL5	BCL2L1	CCL18	CCL19	RGS16	MYD88	RXRB	ACADS	RELA	MAP2K7	CLDN3	CLDN4	CXCL16	S1PR4	BIN1	CTNNB1	TNFRSF1A	ABHD16A	PTMS	MMP13	IL12B	IMP3	NCAPH2	CENPB	TACR1	CETP	PRCC	KIFC3	MTCH1	CA11	ELAVL1	HPS1	TIMP1	ECH1	HADH	KLF2	PKN1	HMOX1	GATA1	TOMM40	RANGAP1	UCK1	APBA2	FAM110A	JUN	BAX	ZNF444
WP_RAC1PAK1P38MMP2_PATHWAY	http://www.gsea-msigdb.org/gsea/msigdb/cards/WP_RAC1PAK1P38MMP2_PATHWAY	CTNNB1	CASP9	AKT1	SRC	DOK2	TNIP1	GRB7	GRB2	RAC1	MAPK12	RELA	BAX	TIE1	MAPK11	RAD51
WP_7Q1123_COPY_NUMBER_VARIATION_SYNDROME	http://www.gsea-msigdb.org/gsea/msigdb/cards/WP_7Q1123_COPY_NUMBER_VARIATION_SYNDROME	VPS37C	ULK1	OGDH	CFL1	DNAJC30	MT-ATP6	MT-ATP8	FBLN5	WNT2	CLDN3	CLDN4	NSUN5P2	CLDN5	VPS28	CTNNB1	HMGA1	VPS37D	NSUN5P1	BCL7B	UBIAD1	VAMP2	LIMK1	SQSTM1
WP_EBOLA_VIRUS_PATHWAY_ON_HOST	http://www.gsea-msigdb.org/gsea/msigdb/cards/WP_EBOLA_VIRUS_PATHWAY_ON_HOST	VPS16	IKBKE	ICAM3	ICAM2	MFGE8	RELA	RELB	ASGR1	RAB7A	ITGA5	NPC2	ITGAV	AKT1	ACTB	DDX58	ACTG1	RAC1	HLA-DOA	GSN
WP_EPITHELIAL_TO_MESENCHYMAL_TRANSITION_IN_COLORECTAL_CANCER	http://www.gsea-msigdb.org/gsea/msigdb/cards/WP_EPITHELIAL_TO_MESENCHYMAL_TRANSITION_IN_COLORECTAL_CANCER	TGFB1	MMP15	TWIST2	HIF1A	DLK1	NOTCH3	FZD3	GDF15	WNT2	FZD4	SMAD2	MAPK12	FZD8	ID1	CLDN7	CLDN3	CLDN4	MAPK11	FZD10	MAP2K3	CTDSP1	CLDN5	WNT10B	CTNNB1	ITGA5	JUP	DLL4	AKT1	GRB2	LRP6	WNT3A	SHC1	FZD2	SNAI1
WP_FOLATE_METABOLISM	http://www.gsea-msigdb.org/gsea/msigdb/cards/WP_FOLATE_METABOLISM	AHCY	FOLR2	HBB	ABCA1	GPX3	GPX1	SOD3	RELA
WP_REGULATION_OF_ACTIN_CYTOSKELETON	http://www.gsea-msigdb.org/gsea/msigdb/cards/WP_REGULATION_OF_ACTIN_CYTOSKELETON	WAS	CFL1	RRAS	CD14	ARHGEF1	PIP5K1C	RDX	APC2	PFN1	ACTB	PPP1R12A	RAC2	RAC3	GNA12	VCL	ACTG1	RAC1	CSK	LIMK1	GSN
WP_TGFBETA_RECEPTOR_SIGNALLING_IN_SKELETAL_DYSPLASIAS	http://www.gsea-msigdb.org/gsea/msigdb/cards/WP_TGFBETA_RECEPTOR_SIGNALLING_IN_SKELETAL_DYSPLASIAS	LTBP3	TGFB1	SMAD7	SMAD9	CTNNB1	FKBP1A	JUN	ADAMTSL2	SMAD2	ENG	TFE3
WP_TOLLLIKE_RECEPTOR_SIGNALING_RELATED_TO_MYD88	http://www.gsea-msigdb.org/gsea/msigdb/cards/WP_TOLLLIKE_RECEPTOR_SIGNALING_RELATED_TO_MYD88	TRAF3	IKBKE	TICAM1	RELA	RELB	MYD88
WP_NRF2_PATHWAY	http://www.gsea-msigdb.org/gsea/msigdb/cards/WP_NRF2_PATHWAY	SLC2A6	SERPINA1	TGFB1	GCLC	SOD3	HMOX1	SLC39A3	KEAP1	GPX3	SLC39A1	FTL	MGST2	SLC2A13	ALDH3A1	SQSTM1
WP_G_PROTEIN_SIGNALING_PATHWAYS	http://www.gsea-msigdb.org/gsea/msigdb/cards/WP_G_PROTEIN_SIGNALING_PATHWAYS	KCNJ3	GNG11	MIR7706	ADCY7	GNB2	RRAS	ARHGEF1	PRKACA	GNAI2	GNA12	GNA15	GNB1
WP_ELECTRON_TRANSPORT_CHAIN_OXPHOS_SYSTEM_IN_MITOCHONDRIA	http://www.gsea-msigdb.org/gsea/msigdb/cards/WP_ELECTRON_TRANSPORT_CHAIN_OXPHOS_SYSTEM_IN_MITOCHONDRIA	NDUFA3	NDUFS6	COX8A	COX7A1	MT-ATP6	MT-ATP8	NDUFS7	COX5A	UCP2	MT-CYB	MT-CO1	MT-CO2	SDHC	SDHD	UQCR11	MT-ND6	SURF1	MT-ND1	MT-ND2	MT-ND3	MT-ND4	MT-ND4L	SLC25A6	NDUFB3	NDUFA9
WP_OXIDATIVE_PHOSPHORYLATION	http://www.gsea-msigdb.org/gsea/msigdb/cards/WP_OXIDATIVE_PHOSPHORYLATION	NDUFA3	NDUFA11	NDUFS6	MT-ND6	MT-ND1	MT-ND2	MT-ND3	MT-ND4	MT-ND4L	MT-ATP6	NDUFS7	NDUFA9
WP_VEGFAVEGFR2_SIGNALING_PATHWAY	http://www.gsea-msigdb.org/gsea/msigdb/cards/WP_VEGFAVEGFR2_SIGNALING_PATHWAY	NOS3	GIPC1	RELA	MAP2K7	MAP2K3	FHOD1	CTNNB1	CAPZB	CNP	MTOR	ITGAV	SRC	PBXIP1	ELK1	CRIP2	SRF	RAC1	ENG	AP2S1	MMP10	MMRN2	FSCN1	SHC2	SELE	CFL1	IGFBP7	ARRB2	MAPK12	MLST8	NRARP	HBD	PFN1	YWHAE	DLL4	AKT1	PGF	ARHGEF15	VCL	SLC25A11	SHC1	SDF2L1	BCL2L1	INPP5K	FJX1	TUBA1C	AKT1S1	TEAD4	BIN1
WP_MAPK_SIGNALING_PATHWAY	http://www.gsea-msigdb.org/gsea/msigdb/cards/WP_MAPK_SIGNALING_PATHWAY	MAP3K11	ARAF	RRAS	CD14	RELA	RELB	MIR935	MAP2K7	HSPA1L	MAPK11	MAP2K3	TNFRSF1A	MAP4K2	RAC2	RAC3	ELK1	SRF	TAOK3	RAC1	DUSP2	DUSP1	DUSP7	TGFB1	DUSP8	ARRB2	MAPK8IP2	MAPK12	PRKACA	MAPKAPK3	TAB1	RPS6KA4	MAPK7	ECSIT	AKT1	JUN	GNA12	GRB2	PLA2G4E
[truncated: 15 more columns]
