# Supplementary material for: Investigating isoform switching in RHBDF2 and its role in neoplastic growth in breast cancer
Source: PeerJ. 2022 Nov 25;10:e14124. doi: 10.7717/peerj.14124 (PMC9703992; doi:10.7717/peerj.14124)
Supplement: Supplemental Information 4 [file peerj-10-14124-s004.xlsx]

## Sheet: GSEA-cub to canonical
NAME	GS<br> follow link to MSigDB	GS DETAILS	SIZE	ES	NES	NOM p-val	FDR q-val	FWER p-val	RANK AT MAX	LEADING EDGE
WP_PROTEASOME_DEGRADATION	WP_PROTEASOME_DEGRADATION	Details ...	7	0.426441	1.36914	0.00267326	0.769768	0.999	71	tags=43%, list=4%, signal=44%
WP_CYTOPLASMIC_RIBOSOMAL_PROTEINS	WP_CYTOPLASMIC_RIBOSOMAL_PROTEINS	Details ...	17	0.384236	1.85614	0.00458301	0.337382	0.459	993	tags=94%, list=56%, signal=212%
WP_REGULATION_OF_TOLLLIKE_RECEPTOR_SIGNALING_PATHWAY	WP_REGULATION_OF_TOLLLIKE_RECEPTOR_SIGNALING_PATHWAY	Details ...	5	0.679864	1.90432	0.00670874	0.483766	0.36	570	tags=100%, list=32%, signal=147%
WP_GPCRS_CLASS_A_RHODOPSINLIKE	WP_GPCRS_CLASS_A_RHODOPSINLIKE	Details ...	9	0.151361	0.538919	0.0432257	0.988787	1	1505	tags=100%, list=85%, signal=658%
WP_MAPK_SIGNALING_PATHWAY	WP_MAPK_SIGNALING_PATHWAY	Details ...	16	0.333998	1.5687	0.0478806	0.454216	0.944	442	tags=56%, list=25%, signal=74%
WP_NEURAL_CREST_DIFFERENTIATION	WP_NEURAL_CREST_DIFFERENTIATION	Details ...	5	0.648756	1.80944	0.0518343	0.290166	0.55	625	tags=100%, list=35%, signal=154%
WP_TCELL_RECEPTOR_AND_COSTIMULATORY_SIGNALING	WP_TCELL_RECEPTOR_AND_COSTIMULATORY_SIGNALING	Details ...	5	0.636279	1.77324	0.0533333	0.269741	0.63	327	tags=80%, list=18%, signal=98%
WP_MESODERMAL_COMMITMENT_PATHWAY	WP_MESODERMAL_COMMITMENT_PATHWAY	Details ...	11	0.402294	1.63624	0.0563636	0.449879	0.872	438	tags=64%, list=25%, signal=84%
WP_TCELL_ANTIGEN_RECEPTOR_TCR_PATHWAY_DURING_STAPHYLOCOCCUS_AUREUS_INFECTION	WP_TCELL_ANTIGEN_RECEPTOR_TCR_PATHWAY_DURING_STAPHYLOCOCCUS_AUREUS_INFECTION	Details ...	6	0.536502	1.62773	0.0526357	0.392653	0.882	824	tags=100%, list=46%, signal=186%
WP_WNT_SIGNALING_PATHWAY_AND_PLURIPOTENCY	WP_WNT_SIGNALING_PATHWAY_AND_PLURIPOTENCY	Details ...	9	0.387116	1.41407	0.0914761	0.805419	0.995	684	tags=78%, list=39%, signal=126%
WP_NONGENOMIC_ACTIONS_OF_125_DIHYDROXYVITAMIN_D3	WP_NONGENOMIC_ACTIONS_OF_125_DIHYDROXYVITAMIN_D3	Details ...	6	0.466327	1.38792	0.125483	0.796719	0.999	948	tags=100%, list=53%, signal=214%
WP_TGFBETA_SIGNALING_PATHWAY	WP_TGFBETA_SIGNALING_PATHWAY	Details ...	13	0.314009	1.35785	0.122568	0.734544	1	562	tags=62%, list=32%, signal=89%
WP_HEMATOPOIETIC_STEM_CELL_DIFFERENTIATION	WP_HEMATOPOIETIC_STEM_CELL_DIFFERENTIATION	Details ...	6	0.451047	1.34581	0.132812	0.709958	1	975	tags=100%, list=55%, signal=221%
WP_PI3KAKT_SIGNALING_PATHWAY	WP_PI3KAKT_SIGNALING_PATHWAY	Details ...	13	0.316477	1.34115	0.14053	0.666986	1	1215	tags=100%, list=69%, signal=315%
WP_ENDODERM_DIFFERENTIATION	WP_ENDODERM_DIFFERENTIATION	Details ...	13	0.310233	1.3239	0.149901	0.662653	1	435	tags=54%, list=25%, signal=71%
WP_TCELL_ANTIGEN_RECEPTOR_TCR_SIGNALING_PATHWAY	WP_TCELL_ANTIGEN_RECEPTOR_TCR_SIGNALING_PATHWAY	Details ...	7	0.39418	1.31031	0.154982	0.652063	1	824	tags=86%, list=46%, signal=160%
WP_CYTOSOLIC_DNASENSING_PATHWAY	WP_CYTOSOLIC_DNASENSING_PATHWAY	Details ...	5	0.460528	1.29638	0.153271	0.64541	1	278	tags=60%, list=16%, signal=71%
WP_GLUCOCORTICOID_RECEPTOR_PATHWAY	WP_GLUCOCORTICOID_RECEPTOR_PATHWAY	Details ...	5	0.453138	1.23437	0.228457	0.754373	1	624	tags=80%, list=35%, signal=123%
WP_MECP2_AND_ASSOCIATED_RETT_SYNDROME	WP_MECP2_AND_ASSOCIATED_RETT_SYNDROME	Details ...	7	0.384559	1.21327	0.220077	0.763176	1	383	tags=57%, list=22%, signal=73%
WP_COPPER_HOMEOSTASIS	WP_COPPER_HOMEOSTASIS	Details ...	6	0.391624	1.1675	0.241176	0.84603	1	1080	tags=100%, list=61%, signal=255%
WP_VITAMIN_D_RECEPTOR_PATHWAY	WP_VITAMIN_D_RECEPTOR_PATHWAY	Details ...	7	0.360544	1.14524	0.286807	0.865592	1	876	tags=86%, list=49%, signal=169%
WP_PHOTODYNAMIC_THERAPYINDUCED_AP1_SURVIVAL_SIGNALING	WP_PHOTODYNAMIC_THERAPYINDUCED_AP1_SURVIVAL_SIGNALING	Details ...	6	0.366079	1.08508	0.370093	0.999981	1	562	tags=67%, list=32%, signal=97%
WP_APOPTOSIS_MODULATION_AND_SIGNALING	WP_APOPTOSIS_MODULATION_AND_SIGNALING	Details ...	6	0.354583	1.07701	0.352031	0.977924	1	294	tags=50%, list=17%, signal=60%
WP_16P112_PROXIMAL_DELETION_SYNDROME	WP_16P112_PROXIMAL_DELETION_SYNDROME	Details ...	6	0.357052	1.06994	0.333948	0.954406	1	562	tags=67%, list=32%, signal=97%
WP_INTEGRATED_BREAST_CANCER_PATHWAY	WP_INTEGRATED_BREAST_CANCER_PATHWAY	Details ...	8	0.292534	1.00793	0.446215	1	1	825	tags=75%, list=47%, signal=140%
WP_22Q112_COPY_NUMBER_VARIATION_SYNDROME	WP_22Q112_COPY_NUMBER_VARIATION_SYNDROME	Details ...	10	0.264322	1.00484	0.418972	1	1	1306	tags=100%, list=74%, signal=378%
WP_SUDDEN_INFANT_DEATH_SYNDROME_SIDS_SUSCEPTIBILITY_PATHWAYS	WP_SUDDEN_INFANT_DEATH_SYNDROME_SIDS_SUSCEPTIBILITY_PATHWAYS	Details ...	9	0.278345	0.993953	0.438384	1	1	1281	tags=100%, list=72%, signal=359%
WP_NOTCH_SIGNALING_PATHWAY_NETPATH	WP_NOTCH_SIGNALING_PATHWAY_NETPATH	Details ...	5	0.3569	0.985689	0.48996	1	1	1141	tags=100%, list=64%, signal=280%
WP_PARKINUBIQUITIN_PROTEASOMAL_SYSTEM_PATHWAY	WP_PARKINUBIQUITIN_PROTEASOMAL_SYSTEM_PATHWAY	Details ...	5	0.355769	0.985504	0.460606	1	1	1143	tags=100%, list=64%, signal=281%
WP_MYOMETRIAL_RELAXATION_AND_CONTRACTION_PATHWAYS	WP_MYOMETRIAL_RELAXATION_AND_CONTRACTION_PATHWAYS	Details ...	8	0.278187	0.974291	0.440546	0.997956	1	1281	tags=100%, list=72%, signal=359%
WP_ALLOGRAFT_REJECTION	WP_ALLOGRAFT_REJECTION	Details ...	6	0.326313	0.963491	0.460474	0.992913	1	53	tags=33%, list=3%, signal=34%
WP_NONALCOHOLIC_FATTY_LIVER_DISEASE	WP_NONALCOHOLIC_FATTY_LIVER_DISEASE	Details ...	7	0.299651	0.961606	0.475806	0.965562	1	989	tags=86%, list=56%, signal=193%
WP_ARRHYTHMOGENIC_RIGHT_VENTRICULAR_CARDIOMYOPATHY	WP_ARRHYTHMOGENIC_RIGHT_VENTRICULAR_CARDIOMYOPATHY	Details ...	7	0.298221	0.959317	0.48728	0.941102	1	982	tags=86%, list=55%, signal=191%
WP_ANDROGEN_RECEPTOR_SIGNALING_PATHWAY	WP_ANDROGEN_RECEPTOR_SIGNALING_PATHWAY	Details ...	10	0.253713	0.952767	0.478702	0.928367	1	1147	tags=90%, list=65%, signal=253%
WP_HOSTPATHOGEN_INTERACTION_OF_HUMAN_CORONA_VIRUSES_MAPK_SIGNALING	WP_HOSTPATHOGEN_INTERACTION_OF_HUMAN_CORONA_VIRUSES_MAPK_SIGNALING	Details ...	6	0.317789	0.94215	0.506931	0.926122	1	915	tags=83%, list=52%, signal=172%
WP_VIRAL_ACUTE_MYOCARDITIS	WP_VIRAL_ACUTE_MYOCARDITIS	Details ...	6	0.302773	0.919759	0.542802	0.953949	1	1237	tags=100%, list=70%, signal=330%
WP_CALCIUM_REGULATION_IN_THE_CARDIAC_CELL	WP_CALCIUM_REGULATION_IN_THE_CARDIAC_CELL	Details ...	7	0.278029	0.892432	0.59127	0.988553	1	1281	tags=100%, list=72%, signal=359%
WP_ADIPOGENESIS	WP_ADIPOGENESIS	Details ...	9	0.24232	0.880614	0.606936	0.988618	1	752	tags=67%, list=42%, signal=115%
WP_LEPTIN_SIGNALING_PATHWAY	WP_LEPTIN_SIGNALING_PATHWAY	Details ...	6	0.290167	0.867049	0.633745	0.992231	1	691	tags=67%, list=39%, signal=109%
WP_RAS_SIGNALING	WP_RAS_SIGNALING	Details ...	10	0.22008	0.850666	0.631579	1	1	1384	tags=100%, list=78%, signal=453%
WP_GASTRIN_SIGNALING_PATHWAY	WP_GASTRIN_SIGNALING_PATHWAY	Details ...	5	0.302522	0.839674	0.660455	0.999534	1	876	tags=80%, list=49%, signal=158%
WP_AMYOTROPHIC_LATERAL_SCLEROSIS_ALS	WP_AMYOTROPHIC_LATERAL_SCLEROSIS_ALS	Details ...	5	0.305475	0.836034	0.64833	0.982797	1	877	tags=80%, list=49%, signal=158%
WP_IL18_SIGNALING_PATHWAY	WP_IL18_SIGNALING_PATHWAY	Details ...	15	0.18371	0.824173	0.66537	0.982018	1	1192	tags=87%, list=67%, signal=262%
WP_INTERFERON_TYPE_I_SIGNALING_PATHWAYS	WP_INTERFERON_TYPE_I_SIGNALING_PATHWAYS	Details ...	5	0.295533	0.82401	0.692008	0.95957	1	562	tags=60%, list=32%, signal=88%
WP_APOPTOSIS	WP_APOPTOSIS	Details ...	6	0.269686	0.809631	0.686538	0.965034	1	442	tags=50%, list=25%, signal=66%
WP_KIT_RECEPTOR_SIGNALING_PATHWAY	WP_KIT_RECEPTOR_SIGNALING_PATHWAY	Details ...	6	0.268857	0.803171	0.708249	0.955196	1	438	tags=50%, list=25%, signal=66%
WP_HUMAN_THYROID_STIMULATING_HORMONE_TSH_SIGNALING_PATHWAY	WP_HUMAN_THYROID_STIMULATING_HORMONE_TSH_SIGNALING_PATHWAY	Details ...	5	0.291152	0.790998	0.709278	0.957161	1	562	tags=60%, list=32%, signal=88%
WP_B_CELL_RECEPTOR_SIGNALING_PATHWAY	WP_B_CELL_RECEPTOR_SIGNALING_PATHWAY	Details ...	12	0.187962	0.78431	0.728155	0.948784	1	1441	tags=100%, list=81%, signal=530%
WP_RETINOBLASTOMA_GENE_IN_CANCER	WP_RETINOBLASTOMA_GENE_IN_CANCER	Details ...	10	0.205044	0.782931	0.72233	0.931299	1	1040	tags=80%, list=59%, signal=192%
WP_GENES_INVOLVED_IN_MALE_INFERTILITY	WP_GENES_INVOLVED_IN_MALE_INFERTILITY	Details ...	7	0.237727	0.761163	0.769531	0.948269	1	1095	tags=86%, list=62%, signal=223%
WP_TYROBP_CAUSAL_NETWORK	WP_TYROBP_CAUSAL_NETWORK	Details ...	5	0.266968	0.736146	0.758416	0.968888	1	1300	tags=100%, list=73%, signal=374%
WP_PATHWAYS_IN_CLEAR_CELL_RENAL_CELL_CARCINOMA	WP_PATHWAYS_IN_CLEAR_CELL_RENAL_CELL_CARCINOMA	Details ...	6	0.242015	0.729017	0.78499	0.960301	1	205	tags=33%, list=12%, signal=38%
WP_SELENIUM_MICRONUTRIENT_NETWORK	WP_SELENIUM_MICRONUTRIENT_NETWORK	Details ...	5	0.25891	0.724674	0.812877	0.948125	1	278	tags=40%, list=16%, signal=47%
WP_FOCAL_ADHESION	WP_FOCAL_ADHESION	Details ...	7	0.215922	0.714263	0.822612	0.945451	1	406	tags=43%, list=23%, signal=55%
WP_ANGIOPOIETIN_LIKE_PROTEIN_8_REGULATORY_PATHWAY	WP_ANGIOPOIETIN_LIKE_PROTEIN_8_REGULATORY_PATHWAY	Details ...	10	0.185217	0.712301	0.832423	0.930737	1	740	tags=60%, list=42%, signal=102%
WP_ECTODERM_DIFFERENTIATION	WP_ECTODERM_DIFFERENTIATION	Details ...	6	0.234861	0.702475	0.841667	0.926903	1	1357	tags=100%, list=77%, signal=425%
WP_DNA_DAMAGE_RESPONSE_ONLY_ATM_DEPENDENT	WP_DNA_DAMAGE_RESPONSE_ONLY_ATM_DEPENDENT	Details ...	9	0.188526	0.678264	0.885496	0.938466	1	278	tags=33%, list=16%, signal=39%
WP_SMALL_CELL_LUNG_CANCER	WP_SMALL_CELL_LUNG_CANCER	Details ...	6	0.217287	0.649966	0.889328	0.952537	1	804	tags=67%, list=45%, signal=122%
WP_CIRCADIAN_RHYTHM_RELATED_GENES	WP_CIRCADIAN_RHYTHM_RELATED_GENES	Details ...	12	0.150786	0.619375	0.928016	0.966063	1	918	tags=67%, list=52%, signal=137%
WP_HEPATITIS_B_INFECTION	WP_HEPATITIS_B_INFECTION	Details ...	6	0.186191	0.559194	0.983773	0.994061	1	1443	tags=100%, list=81%, signal=535%
WP_SARSCOV2_INNATE_IMMUNITY_EVASION_AND_CELLSPECIFIC_IMMUNE_RESPONSE	WP_SARSCOV2_INNATE_IMMUNITY_EVASION_AND_CELLSPECIFIC_IMMUNE_RESPONSE		5	0.162027	0.442007	0.993763	0.997549	1	442	tags=40%, list=25%, signal=53%
