# Supplementary material for: Investigating isoform switching in RHBDF2 and its role in neoplastic growth in breast cancer
Source: PeerJ. 2022 Nov 25;10:e14124. doi: 10.7717/peerj.14124 (PMC9703992; doi:10.7717/peerj.14124)
Supplement: Supplemental Information 5 [file peerj-10-14124-s005.xlsx]

## Sheet: gene_sets_cub to canonical
WP_CILIARY_LANDSCAPE	http://www.gsea-msigdb.org/gsea/msigdb/cards/WP_CILIARY_LANDSCAPE	WNK1	IFT52	TFAP2E	RAB14	NFKB1	CEP97	VAPB	GLA	GLB1	IQGAP1	ARMC8	LRPPRC	XPNPEP3	BBS5	DYNC1H1	EXOC2	MKLN1	RB1
WP_CILIOPATHIES	http://www.gsea-msigdb.org/gsea/msigdb/cards/WP_CILIOPATHIES	TMEM138	IFT52	XPNPEP3	BBS5	CCDC114	SUFU	PIK3R4	TMEM17	POC1A	CEP164	OCRL
WP_REGULATION_OF_ACTIN_CYTOSKELETON	http://www.gsea-msigdb.org/gsea/msigdb/cards/WP_REGULATION_OF_ACTIN_CYTOSKELETON	CFL2	PIP4K2C	IQGAP1	BAIAP2	PIK3R4	CRK
WP_P53_TRANSCRIPTIONAL_GENE_NETWORK	http://www.gsea-msigdb.org/gsea/msigdb/cards/WP_P53_TRANSCRIPTIONAL_GENE_NETWORK	TP53I3	TP53INP1	ZMAT3	SLC2A1	POLH	FUCA1
WP_7Q1123_COPY_NUMBER_VARIATION_SYNDROME	http://www.gsea-msigdb.org/gsea/msigdb/cards/WP_7Q1123_COPY_NUMBER_VARIATION_SYNDROME	SPDYE7P	VPS37A	MYO1C	ATPAF1	ABHD11
WP_PHOSPHOINOSITIDES_METABOLISM	http://www.gsea-msigdb.org/gsea/msigdb/cards/WP_PHOSPHOINOSITIDES_METABOLISM	MTMR2	PIK3R4	MTMR7	PIP4K2C	OCRL
WP_DNA_IRDAMAGE_AND_CELLULAR_RESPONSE_VIA_ATR	http://www.gsea-msigdb.org/gsea/msigdb/cards/WP_DNA_IRDAMAGE_AND_CELLULAR_RESPONSE_VIA_ATR	BRIP1	CLK2	CEP164	MDM2	RAD52	CDC45
WP_CELL_CYCLE	http://www.gsea-msigdb.org/gsea/msigdb/cards/WP_CELL_CYCLE	TGFB3	MAD1L1	SMC1B	MDM2	CCND3	CDC45	PTTG2	CCNA1	CDC16	ORC3	RB1
WP_METAPATHWAY_BIOTRANSFORMATION_PHASE_I_AND_II	http://www.gsea-msigdb.org/gsea/msigdb/cards/WP_METAPATHWAY_BIOTRANSFORMATION_PHASE_I_AND_II	GSTM3	KCNAB3	CYP20A1	HS2ST1	NAA30	GPX4	NNMT	GSS
WP_TRANSLATION_FACTORS	http://www.gsea-msigdb.org/gsea/msigdb/cards/WP_TRANSLATION_FACTORS	EIF2B3	EEF1A1	PABPC1	EIF3CL	PAIP1
WP_INSULIN_SIGNALING	http://www.gsea-msigdb.org/gsea/msigdb/cards/WP_INSULIN_SIGNALING	MAP4K1	MAP4K3	RPS6KA1	FOXO1	GAB1	SLC2A1	MYO1C	MAP2K6	XBP1	PIK3R4	SORBS1	GYG1	PRKCQ	RAB4A	CRK	MAP3K13
WP_ERBB_SIGNALING_PATHWAY	http://www.gsea-msigdb.org/gsea/msigdb/cards/WP_ERBB_SIGNALING_PATHWAY	FOXO1	GAB1	MDM2	CRK	HBEGF	NCK2
WP_DNA_REPAIR_PATHWAYS_FULL_NETWORK	http://www.gsea-msigdb.org/gsea/msigdb/cards/WP_DNA_REPAIR_PATHWAYS_FULL_NETWORK	BRIP1	GTF2H5	CETN2	POLH	DDB1	FANCG	XRCC1	RAP1A	RAD52
WP_MRNA_PROCESSING	http://www.gsea-msigdb.org/gsea/msigdb/cards/WP_MRNA_PROCESSING	CLK2	PRPF4B	SUGP2	PRMT1	SF3A2	DHX16	HNRNPA1	HNRNPH1	SF3B5
WP_JOUBERT_SYNDROME	http://www.gsea-msigdb.org/gsea/msigdb/cards/WP_JOUBERT_SYNDROME	BBS5	DVL1	SUFU	TMEM138	CETN2	ARR3	PCM1	TMEM17	CEP164	CEP97
WP_NRF2_PATHWAY	http://www.gsea-msigdb.org/gsea/msigdb/cards/WP_NRF2_PATHWAY	GSTM3	SLC2A1	SLC2A3	ABCC2	SLC39A3	FTL	PPARD	PGD	HBEGF
WP_LNCRNA_INVOLVEMENT_IN_CANONICAL_WNT_SIGNALING_AND_COLORECTAL_CANCER	http://www.gsea-msigdb.org/gsea/msigdb/cards/WP_LNCRNA_INVOLVEMENT_IN_CANONICAL_WNT_SIGNALING_AND_COLORECTAL_CANCER	DVL1	CSNK2A2	CCND3	FZD6	PLAU	LEF1
WP_ONE_CARBON_METABOLISM_AND_RELATED_PATHWAYS	http://www.gsea-msigdb.org/gsea/msigdb/cards/WP_ONE_CARBON_METABOLISM_AND_RELATED_PATHWAYS	GPX4	CEPT1	GPX7	BCAT1	GSS
WP_VEGFAVEGFR2_SIGNALING_PATHWAY	http://www.gsea-msigdb.org/gsea/msigdb/cards/WP_VEGFAVEGFR2_SIGNALING_PATHWAY	FOXO1	GAB1	MYO1C	MAP2K6	CNP	ETS1	RAB4A	NFKB1	CRK	PTPN6	CLIC1	ARNT	IQGAP1	STAT6	PLAU	PLAUR	RPL13A	PGD	RPS11	SDF2L1	RAB37	NUMB	MDM2	HBEGF	PABPC1	APOLD1	STAM	GATA2	RAP1A	TMSB10	DNAJB4	DOK1	KCNC3	OCRL
WP_WNT_SIGNALING	http://www.gsea-msigdb.org/gsea/msigdb/cards/WP_WNT_SIGNALING	DVL1	CSNK2A2	CCND3	FZD6	PLAU	LEF1
WP_NEPHROTIC_SYNDROME	http://www.gsea-msigdb.org/gsea/msigdb/cards/WP_NEPHROTIC_SYNDROME	ALG1	SCARB2	LMNA	GPC5	ZMPSTE24
WP_GENES_RELATED_TO_PRIMARY_CILIUM_DEVELOPMENT_BASED_ON_CRISPR	http://www.gsea-msigdb.org/gsea/msigdb/cards/WP_GENES_RELATED_TO_PRIMARY_CILIUM_DEVELOPMENT_BASED_ON_CRISPR	IFT52	BBS5	TRAPPC11	TMEM17	CEP97
WP_MIRNA_REGULATION_OF_DNA_DAMAGE_RESPONSE	http://www.gsea-msigdb.org/gsea/msigdb/cards/WP_MIRNA_REGULATION_OF_DNA_DAMAGE_RESPONSE	TNFRSF10B	MDM2	CCND3	RAD52	RB1
WP_DNA_DAMAGE_RESPONSE	http://www.gsea-msigdb.org/gsea/msigdb/cards/WP_DNA_DAMAGE_RESPONSE	TNFRSF10B	MDM2	CCND3	RAD52	RB1
WP_SENESCENCE_AND_AUTOPHAGY_IN_CANCER	http://www.gsea-msigdb.org/gsea/msigdb/cards/WP_SENESCENCE_AND_AUTOPHAGY_IN_CANCER	MDM2	PLAU	SLC39A3	IFNG	RB1
WP_METABOLIC_REPROGRAMMING_IN_COLON_CANCER	http://www.gsea-msigdb.org/gsea/msigdb/cards/WP_METABOLIC_REPROGRAMMING_IN_COLON_CANCER	PYCR2	SLC2A1	PGD	PSPH	GART
WP_ESC_PLURIPOTENCY_PATHWAYS	http://www.gsea-msigdb.org/gsea/msigdb/cards/WP_ESC_PLURIPOTENCY_PATHWAYS	DVL1	GAB1	MDM2	FZD6	MAP2K6	SMAD7
WP_NCRNAS_INVOLVED_IN_WNT_SIGNALING_IN_HEPATOCELLULAR_CARCINOMA	http://www.gsea-msigdb.org/gsea/msigdb/cards/WP_NCRNAS_INVOLVED_IN_WNT_SIGNALING_IN_HEPATOCELLULAR_CARCINOMA	DVL1	CSNK2A2	KLF4	LEF1	CCND3	FZD6	PLAU
WP_PYRIMIDINE_METABOLISM	http://www.gsea-msigdb.org/gsea/msigdb/cards/WP_PYRIMIDINE_METABOLISM	POLA1	TK2	TK1	UPP1	POLR3H
WP_SIGNALING_PATHWAYS_IN_GLIOBLASTOMA	http://www.gsea-msigdb.org/gsea/msigdb/cards/WP_SIGNALING_PATHWAYS_IN_GLIOBLASTOMA	FOXO1	GAB1	PRKCQ	MDM2	MAP2K6	RB1
WP_GENOTOXICITY_PATHWAY	http://www.gsea-msigdb.org/gsea/msigdb/cards/WP_GENOTOXICITY_PATHWAY	TP53I3	RPS27	PLK3	BLOC1S2	TRIM22	NLRX1	MDM2	ID2	FBXO22
WP_EGFEGFR_SIGNALING_PATHWAY	http://www.gsea-msigdb.org/gsea/msigdb/cards/WP_EGFEGFR_SIGNALING_PATHWAY	MAP4K1	RPS6KA1	FOXO1	GAB1	STAM	IQGAP1	NCK2	USP6NL	RAP1A	ELK4	CRK	RASA1
WP_BREAST_CANCER_PATHWAY	http://www.gsea-msigdb.org/gsea/msigdb/cards/WP_BREAST_CANCER_PATHWAY	DVL1	CSNK2A2	CETN3	FZD6	LEF1	RB1
WP_FOCAL_ADHESIONPI3KAKTMTORSIGNALING_PATHWAY	http://www.gsea-msigdb.org/gsea/msigdb/cards/WP_FOCAL_ADHESIONPI3KAKTMTORSIGNALING_PATHWAY	FOXO1	MDM2	RAB14	ITGA2B	ITGA4	CREB3L2	EFNA3	PHLPP1	LAMC1	SLC2A1	SLC2A3	PIK3R4	GNB4	ITGA10
WP_PRADERWILLI_AND_ANGELMAN_SYNDROME	http://www.gsea-msigdb.org/gsea/msigdb/cards/WP_PRADERWILLI_AND_ANGELMAN_SYNDROME	PCM1	GABRR2	MDM2	LHB	RB1
WP_G1_TO_S_CELL_CYCLE_CONTROL	http://www.gsea-msigdb.org/gsea/msigdb/cards/WP_G1_TO_S_CELL_CYCLE_CONTROL	MDM2	CCND3	CCNA1	ORC3	CDC45	CCNG2	RB1
WP_FOLATE_METABOLISM	http://www.gsea-msigdb.org/gsea/msigdb/cards/WP_FOLATE_METABOLISM	AHCY	CAT	GPX4	MTHFS	NFKB1	IFNG	GART
WP_EPITHELIAL_TO_MESENCHYMAL_TRANSITION_IN_COLORECTAL_CANCER	http://www.gsea-msigdb.org/gsea/msigdb/cards/WP_EPITHELIAL_TO_MESENCHYMAL_TRANSITION_IN_COLORECTAL_CANCER	TGFB3	PKP2	FZD6	ID2	MAP2K6	SNAI1
WP_THE_OVERLAP_BETWEEN_SIGNAL_TRANSDUCTION_PATHWAYS_THAT_CONTRIBUTE_TO_A_RANGE_OF_LMNA_LAMINOPATHIES	http://www.gsea-msigdb.org/gsea/msigdb/cards/WP_THE_OVERLAP_BETWEEN_SIGNAL_TRANSDUCTION_PATHWAYS_THAT_CONTRIBUTE_TO_A_RANGE_OF_LMNA_LAMINOPATHIES	JUNB	LEF1	ZMPSTE24	LMNA	FNTA	RB1
WP_FRAGILE_X_SYNDROME	http://www.gsea-msigdb.org/gsea/msigdb/cards/WP_FRAGILE_X_SYNDROME	CLTB	GAB1	DLG4	SYNGAP1	EEF1A1	FMR1
WP_HIPPOMERLIN_SIGNALING_DYSREGULATION	http://www.gsea-msigdb.org/gsea/msigdb/cards/WP_HIPPOMERLIN_SIGNALING_DYSREGULATION	SAV1	PRKAR1B	PRKAR2A	DDB1	ITGA2B	ITGA4	ITGA10
WP_INTEGRINMEDIATED_CELL_ADHESION	http://www.gsea-msigdb.org/gsea/msigdb/cards/WP_INTEGRINMEDIATED_CELL_ADHESION	MAP2K6	ITGA2B	ITGA4	SORBS1	RAP1A	CRK	ITGA10
WP_PHOTODYNAMIC_THERAPYINDUCED_HIF1_SURVIVAL_SIGNALING	http://www.gsea-msigdb.org/gsea/msigdb/cards/WP_PHOTODYNAMIC_THERAPYINDUCED_HIF1_SURVIVAL_SIGNALING	TGFB3	HIF1AN	BCL2A1	SLC2A1	ARNT	SLC2A3
WP_EBOLA_VIRUS_PATHWAY_ON_HOST	http://www.gsea-msigdb.org/gsea/msigdb/cards/WP_EBOLA_VIRUS_PATHWAY_ON_HOST	CLTB	HLA-DPB1	HLA-F	CTSB	IQGAP1	ITGA4	BST2	MERTK	NFKB1	RASA2	VPS18
WP_SIGNALING_OF_HEPATOCYTE_GROWTH_FACTOR_RECEPTOR	http://www.gsea-msigdb.org/gsea/msigdb/cards/WP_SIGNALING_OF_HEPATOCYTE_GROWTH_FACTOR_RECEPTOR	MAP4K1	CRK	GAB1	RAP1A	RASA1
WP_NOTCH_SIGNALING	http://www.gsea-msigdb.org/gsea/msigdb/cards/WP_NOTCH_SIGNALING	NUMB	DVL1	NCSTN	DTX4	NCOR2
WP_NUCLEAR_RECEPTORS_METAPATHWAY	http://www.gsea-msigdb.org/gsea/msigdb/cards/WP_NUCLEAR_RECEPTORS_METAPATHWAY	FOXO1	ABCC2	GCC1	IFNG	HBEGF	GSTM3	SLC2A1	ARNT	SLC2A3	GPR153	POU5F1	PRRG4	SLC39A3	JUNB	FTL	PPARD	AMIGO2	PGD	NR1I2	KLK15
WP_CHEMOKINE_SIGNALING_PATHWAY	http://www.gsea-msigdb.org/gsea/msigdb/cards/WP_CHEMOKINE_SIGNALING_PATHWAY	CCL17	CXCR3	RAP1A	NFKB1	CXCR2	GNB4	CRK
WP_SARSCOV2_INNATE_IMMUNITY_EVASION_AND_CELLSPECIFIC_IMMUNE_RESPONSE	http://www.gsea-msigdb.org/gsea/msigdb/cards/WP_SARSCOV2_INNATE_IMMUNITY_EVASION_AND_CELLSPECIFIC_IMMUNE_RESPONSE	TP53I3	TRAF2	NFKB1	CXCR2	IFITM1
WP_GPCRS_CLASS_A_RHODOPSINLIKE	http://www.gsea-msigdb.org/gsea/msigdb/cards/WP_GPCRS_CLASS_A_RHODOPSINLIKE	P2RY1	ACKR4	CXCR2	SSTR3	CYSLTR2	HTR2A	CXCR3	GPR174	RABGAP1
WP_HEPATITIS_B_INFECTION	http://www.gsea-msigdb.org/gsea/msigdb/cards/WP_HEPATITIS_B_INFECTION	TGFB3	MAP2K6	DDB1	STAT6	CREB3L2	NFKB1
WP_CIRCADIAN_RHYTHM_RELATED_GENES	http://www.gsea-msigdb.org/gsea/msigdb/cards/WP_CIRCADIAN_RHYTHM_RELATED_GENES	UBC	TNFRSF11A	HNF1B	RAI1	PHLPP1	AHCY	ARNTL2	ARNT	ID2	KLF10	SIN3A	KLF9
WP_SMALL_CELL_LUNG_CANCER	http://www.gsea-msigdb.org/gsea/msigdb/cards/WP_SMALL_CELL_LUNG_CANCER	LAMC1	TRAF2	RXRB	ITGA2B	NFKB1	RB1
WP_DNA_DAMAGE_RESPONSE_ONLY_ATM_DEPENDENT	http://www.gsea-msigdb.org/gsea/msigdb/cards/WP_DNA_DAMAGE_RESPONSE_ONLY_ATM_DEPENDENT	DVL1	MDM2	CCND3	PLAU	PIK3R4	LEF1	CAT	NFKB1	CCNG2
WP_ECTODERM_DIFFERENTIATION	http://www.gsea-msigdb.org/gsea/msigdb/cards/WP_ECTODERM_DIFFERENTIATION	EDA2R	GAS2L1	GLB1	HMGB2	PAN2	PPARD
WP_ANGIOPOIETIN_LIKE_PROTEIN_8_REGULATORY_PATHWAY	http://www.gsea-msigdb.org/gsea/msigdb/cards/WP_ANGIOPOIETIN_LIKE_PROTEIN_8_REGULATORY_PATHWAY	MAP4K1	MAP4K3	RPS6KA1	FOXO1	SLC2A1	MAP2K6	PIK3R4	TRIP10	CRK	MAP3K13
WP_FOCAL_ADHESION	http://www.gsea-msigdb.org/gsea/msigdb/cards/WP_FOCAL_ADHESION	ITGA2B	ITGA4	CRK	LAMC1	CCND3	RAP1A	ITGA10
WP_SELENIUM_MICRONUTRIENT_NETWORK	http://www.gsea-msigdb.org/gsea/msigdb/cards/WP_SELENIUM_MICRONUTRIENT_NETWORK	PRDX3	CAT	GPX4	NFKB1	IFNG
WP_PATHWAYS_IN_CLEAR_CELL_RENAL_CELL_CARCINOMA	http://www.gsea-msigdb.org/gsea/msigdb/cards/WP_PATHWAYS_IN_CLEAR_CELL_RENAL_CELL_CARCINOMA	TGFB3	ENO2	PFKP	SLC2A1	ARNT	PSPH
WP_TYROBP_CAUSAL_NETWORK	http://www.gsea-msigdb.org/gsea/msigdb/cards/WP_TYROBP_CAUSAL_NETWORK	RPS6KA1	GIMAP2	CREB3L2	IGSF6	CAPG
WP_GENES_INVOLVED_IN_MALE_INFERTILITY	http://www.gsea-msigdb.org/gsea/msigdb/cards/WP_GENES_INVOLVED_IN_MALE_INFERTILITY	REC8	EPSTI1	TSSK6	MDM2	SOX5	CAT	CCNA1
WP_RETINOBLASTOMA_GENE_IN_CANCER	http://www.gsea-msigdb.org/gsea/msigdb/cards/WP_RETINOBLASTOMA_GENE_IN_CANCER	POLA1	SIN3A	FANCG	SAP30	MDM2	CCND3	RABIF	HMGB2	CDC45	RB1
WP_B_CELL_RECEPTOR_SIGNALING_PATHWAY	http://www.gsea-msigdb.org/gsea/msigdb/cards/WP_B_CELL_RECEPTOR_SIGNALING_PATHWAY	MAP4K1	RPS6KA1	PTPN6	MALT1	FOXO1	GAB1	BLNK	MAP2K6	ETS1	NFKB1	CD79A	CRK
WP_HUMAN_THYROID_STIMULATING_HORMONE_TSH_SIGNALING_PATHWAY	http://www.gsea-msigdb.org/gsea/msigdb/cards/WP_HUMAN_THYROID_STIMULATING_HORMONE_TSH_SIGNALING_PATHWAY	RPS6KA1	RAP1A	CCND3	MAP2K6	RB1
WP_KIT_RECEPTOR_SIGNALING_PATHWAY	http://www.gsea-msigdb.org/gsea/msigdb/cards/WP_KIT_RECEPTOR_SIGNALING_PATHWAY	RPS6KA1	PTPN6	JUNB	DOK1	CRK	SNAI1
WP_APOPTOSIS	http://www.gsea-msigdb.org/gsea/msigdb/cards/WP_APOPTOSIS	CASP1	DIABLO	TRAF2	TNFRSF10B	NFKB1	MDM2
WP_INTERFERON_TYPE_I_SIGNALING_PATHWAYS	http://www.gsea-msigdb.org/gsea/msigdb/cards/WP_INTERFERON_TYPE_I_SIGNALING_PATHWAYS	PTPN6	RAP1A	CRK	PRMT1	MAP2K6
WP_IL18_SIGNALING_PATHWAY	http://www.gsea-msigdb.org/gsea/msigdb/cards/WP_IL18_SIGNALING_PATHWAY	RXRB	MYH6	PYGB	ITGA2B	NFKB1	IFNG	MTCH1	TRPC4AP	SLC4A7	BPGM	KLF2	B2M	RPS11	ZNF444	UGGT1
WP_AMYOTROPHIC_LATERAL_SCLEROSIS_ALS	http://www.gsea-msigdb.org/gsea/msigdb/cards/WP_AMYOTROPHIC_LATERAL_SCLEROSIS_ALS	CASP1	DAXX	CCS	MAP2K6	CAT
WP_GASTRIN_SIGNALING_PATHWAY	http://www.gsea-msigdb.org/gsea/msigdb/cards/WP_GASTRIN_SIGNALING_PATHWAY	FOXO1	KLF4	PRKCQ	NFKB1	CRK
WP_RAS_SIGNALING	http://www.gsea-msigdb.org/gsea/msigdb/cards/WP_RAS_SIGNALING	GAB1	SYNGAP1	RASGRP1	RAP1A	EXOC2	ETS1	NFKB1	GNB4	RASA1	RASA2
WP_LEPTIN_SIGNALING_PATHWAY	http://www.gsea-msigdb.org/gsea/msigdb/cards/WP_LEPTIN_SIGNALING_PATHWAY	RPS6KA1	IL1RN	FOXO1	CISH	CFL2	NFKB1
WP_ADIPOGENESIS	http://www.gsea-msigdb.org/gsea/msigdb/cards/WP_ADIPOGENESIS	DVL1	FOXO1	ZMPSTE24	LMNA	STAT6	GATA2	PPARD	NCOR2	RB1
WP_CALCIUM_REGULATION_IN_THE_CARDIAC_CELL	http://www.gsea-msigdb.org/gsea/msigdb/cards/WP_CALCIUM_REGULATION_IN_THE_CARDIAC_CELL	PRKAR1B	PRKAR2A	ANXA6	ITPR3	PRKCQ	GNB4	RGS3
WP_VIRAL_ACUTE_MYOCARDITIS	http://www.gsea-msigdb.org/gsea/msigdb/cards/WP_VIRAL_ACUTE_MYOCARDITIS	CASP1	IFNG	MYH6	MICA	PABPC1	RASA1
WP_HOSTPATHOGEN_INTERACTION_OF_HUMAN_CORONA_VIRUSES_MAPK_SIGNALING	http://www.gsea-msigdb.org/gsea/msigdb/cards/WP_HOSTPATHOGEN_INTERACTION_OF_HUMAN_CORONA_VIRUSES_MAPK_SIGNALING	RPS6KA1	IFITM2	JUNB	MAP2K6	BST2	IFITM1
WP_ANDROGEN_RECEPTOR_SIGNALING_PATHWAY	http://www.gsea-msigdb.org/gsea/msigdb/cards/WP_ANDROGEN_RECEPTOR_SIGNALING_PATHWAY	SIN3A	TGFB1I1	DAXX	FOXO1	UBE2I	MDM2	BAG1	NCOR2	PSMC3IP	RB1
WP_ARRHYTHMOGENIC_RIGHT_VENTRICULAR_CARDIOMYOPATHY	http://www.gsea-msigdb.org/gsea/msigdb/cards/WP_ARRHYTHMOGENIC_RIGHT_VENTRICULAR_CARDIOMYOPATHY	ITGA2B	ITGA4	LEF1	PKP2	CACNA2D2	LMNA	ITGA10
WP_NONALCOHOLIC_FATTY_LIVER_DISEASE	http://www.gsea-msigdb.org/gsea/msigdb/cards/WP_NONALCOHOLIC_FATTY_LIVER_DISEASE	TRAF2	SMAD7	XBP1	ADIPOR2	NDUFA4L2	NFKB1	NDUFB1
WP_ALLOGRAFT_REJECTION	http://www.gsea-msigdb.org/gsea/msigdb/cards/WP_ALLOGRAFT_REJECTION	CSNK2A2	HLA-DPB1	HLA-F	IFNG	PECR	MICA
WP_MYOMETRIAL_RELAXATION_AND_CONTRACTION_PATHWAYS	http://www.gsea-msigdb.org/gsea/msigdb/cards/WP_MYOMETRIAL_RELAXATION_AND_CONTRACTION_PATHWAYS	PRKAR1B	PRKAR2A	ITPR3	CRCP	PRKCQ	NFKB1	GNB4	RGS3
WP_PARKINUBIQUITIN_PROTEASOMAL_SYSTEM_PATHWAY	http://www.gsea-msigdb.org/gsea/msigdb/cards/WP_PARKINUBIQUITIN_PROTEASOMAL_SYSTEM_PATHWAY	TUBB	CASP1	PSMD5	TUBA4A	HSPA4
WP_NOTCH_SIGNALING_PATHWAY_NETPATH	http://www.gsea-msigdb.org/gsea/msigdb/cards/WP_NOTCH_SIGNALING_PATHWAY_NETPATH	NUMB	SAP30	NFKB1	NCSTN	NCOR2
WP_SUDDEN_INFANT_DEATH_SYNDROME_SIDS_SUSCEPTIBILITY_PATHWAYS	http://www.gsea-msigdb.org/gsea/msigdb/cards/WP_SUDDEN_INFANT_DEATH_SYNDROME_SIDS_SUSCEPTIBILITY_PATHWAYS	HTR2A	PRKAR1B	PRKAR2A	HADHA	POU5F1	GATA2	IL1RN	CDCA7L	NFKB1
WP_22Q112_COPY_NUMBER_VARIATION_SYNDROME	http://www.gsea-msigdb.org/gsea/msigdb/cards/WP_22Q112_COPY_NUMBER_VARIATION_SYNDROME	MALT1	TANGO2	ZDHHC8	TMEM191A	CDC45	LZTR1	SERPIND1	CBX5	HIC2	GP5
WP_INTEGRATED_BREAST_CANCER_PATHWAY	http://www.gsea-msigdb.org/gsea/msigdb/cards/WP_INTEGRATED_BREAST_CANCER_PATHWAY	FOXO1	MDM2	PLK3	SMAD7	RAP1A	NFKB1	MAP3K13	RB1
WP_16P112_PROXIMAL_DELETION_SYNDROME	http://www.gsea-msigdb.org/gsea/msigdb/cards/WP_16P112_PROXIMAL_DELETION_SYNDROME	CCT6A	UNC13B	KIF22	TRAF2	NFKB1	MAP2K6
WP_APOPTOSIS_MODULATION_AND_SIGNALING	http://www.gsea-msigdb.org/gsea/msigdb/cards/WP_APOPTOSIS_MODULATION_AND_SIGNALING	BCL2A1	CASP1	DAXX	DIABLO	TNFRSF10B	NFKB1
WP_PHOTODYNAMIC_THERAPYINDUCED_AP1_SURVIVAL_SIGNALING	http://www.gsea-msigdb.org/gsea/msigdb/cards/WP_PHOTODYNAMIC_THERAPYINDUCED_AP1_SURVIVAL_SIGNALING	JUNB	TRAF2	IFNG	HBEGF	MAP2K6	RB1
WP_VITAMIN_D_RECEPTOR_PATHWAY	http://www.gsea-msigdb.org/gsea/msigdb/cards/WP_VITAMIN_D_RECEPTOR_PATHWAY	FOXO1	STAM	RASGRP1	KLF4	JUNB	PRKCQ	PPARD
WP_COPPER_HOMEOSTASIS	http://www.gsea-msigdb.org/gsea/msigdb/cards/WP_COPPER_HOMEOSTASIS	FOXO1	MDM2	MT1L	SLC31A1	MTF2	CCS
WP_MECP2_AND_ASSOCIATED_RETT_SYNDROME	http://www.gsea-msigdb.org/gsea/msigdb/cards/WP_MECP2_AND_ASSOCIATED_RETT_SYNDROME	SIN3A	ARHGEF26	CNP	TAP1	MPP1	HNRNPH1	GABRR2
WP_GLUCOCORTICOID_RECEPTOR_PATHWAY	http://www.gsea-msigdb.org/gsea/msigdb/cards/WP_GLUCOCORTICOID_RECEPTOR_PATHWAY	POU5F1	PRRG4	AMIGO2	NR1I2	GPR153
WP_CYTOSOLIC_DNASENSING_PATHWAY	http://www.gsea-msigdb.org/gsea/msigdb/cards/WP_CYTOSOLIC_DNASENSING_PATHWAY	CASP1	POLR3H	NFKB1	NLRX1	ZBP1
WP_TCELL_ANTIGEN_RECEPTOR_TCR_SIGNALING_PATHWAY	http://www.gsea-msigdb.org/gsea/msigdb/cards/WP_TCELL_ANTIGEN_RECEPTOR_TCR_SIGNALING_PATHWAY	MAP4K1	MALT1	IL15RA	PRKCQ	CD8A	NFKB1	CRK
WP_ENDODERM_DIFFERENTIATION	http://www.gsea-msigdb.org/gsea/msigdb/cards/WP_ENDODERM_DIFFERENTIATION	LAMC1	FOXO1	WDFY2	TOX	HNF1B	LRPPRC	POU5F1	LEF1	JARID2	ELK4	MTF2	PABPC1	CAND1
WP_PI3KAKT_SIGNALING_PATHWAY	http://www.gsea-msigdb.org/gsea/msigdb/cards/WP_PI3KAKT_SIGNALING_PATHWAY	PKN3	MDM2	ITGA2B	ITGA4	CREB3L2	EFNA3	NFKB1	PHLPP1	LAMC1	PIK3R6	CCND3	GNB4	ITGA10
WP_HEMATOPOIETIC_STEM_CELL_DIFFERENTIATION	http://www.gsea-msigdb.org/gsea/msigdb/cards/WP_HEMATOPOIETIC_STEM_CELL_DIFFERENTIATION	GATA2	RHOH	ITGA2B	LEF1	NFE2	TRAF3IP3
WP_TGFBETA_SIGNALING_PATHWAY	http://www.gsea-msigdb.org/gsea/msigdb/cards/WP_TGFBETA_SIGNALING_PATHWAY	MAP4K1	TGFB1I1	UBE2I	PARD6A	PRKAR2A	KLF10	MAP2K6	WWP1	SMAD7	SIN3A	JUNB	ETS1	PPM1A
WP_PROTEASOME_DEGRADATION	http://www.gsea-msigdb.org/gsea/msigdb/cards/WP_PROTEASOME_DEGRADATION	UBC	PSMB9	HLA-F	IFNG	PSMD5	PSMB8	PSME1
WP_NONGENOMIC_ACTIONS_OF_125_DIHYDROXYVITAMIN_D3	http://www.gsea-msigdb.org/gsea/msigdb/cards/WP_NONGENOMIC_ACTIONS_OF_125_DIHYDROXYVITAMIN_D3	OAS2	ETS1	PRKCQ	NFKB1	RXRB	IFNG
WP_WNT_SIGNALING_PATHWAY_AND_PLURIPOTENCY	http://www.gsea-msigdb.org/gsea/msigdb/cards/WP_WNT_SIGNALING_PATHWAY_AND_PLURIPOTENCY	DVL1	CCND3	FZD6	PPM1J	PLAU	POU5F1	LEF1	PPARD	PRKCQ
WP_MAPK_SIGNALING_PATHWAY	http://www.gsea-msigdb.org/gsea/msigdb/cards/WP_MAPK_SIGNALING_PATHWAY	MAP4K1	MAP2K6	NFKB1	ELK4	CRK	TGFB3	MAP4K3	DAXX	TRAF2	CACNA2D2	RASGRP1	RAP1A	PPM1A	MAP3K13	RASA1	RASA2
WP_TCELL_ANTIGEN_RECEPTOR_TCR_PATHWAY_DURING_STAPHYLOCOCCUS_AUREUS_INFECTION	http://www.gsea-msigdb.org/gsea/msigdb/cards/WP_TCELL_ANTIGEN_RECEPTOR_TCR_PATHWAY_DURING_STAPHYLOCOCCUS_AUREUS_INFECTION	PTPN6	MALT1	PRKCQ	CD8A	NFKB1	IFNG
WP_MESODERMAL_COMMITMENT_PATHWAY	http://www.gsea-msigdb.org/gsea/msigdb/cards/WP_MESODERMAL_COMMITMENT_PATHWAY	WDFY2	TOX	POU5F1	KLF4	LEF1	JARID2	EXT2	TWSG1	ELK4	MTF2	SNAI1
WP_TCELL_RECEPTOR_AND_COSTIMULATORY_SIGNALING	http://www.gsea-msigdb.org/gsea/msigdb/cards/WP_TCELL_RECEPTOR_AND_COSTIMULATORY_SIGNALING	NFKB1	PTPN6	RASA1	RASGRP1	CD8A
WP_NEURAL_CREST_DIFFERENTIATION	http://www.gsea-msigdb.org/gsea/msigdb/cards/WP_NEURAL_CREST_DIFFERENTIATION	DVL1	SOX5	ETS1	NFKB1	SNAI1
WP_CYTOPLASMIC_RIBOSOMAL_PROTEINS	http://www.gsea-msigdb.org/gsea/msigdb/cards/WP_CYTOPLASMIC_RIBOSOMAL_PROTEINS	RPS25	RPS27	RPL27A	RPL30	RPS29	RPL13A	RPS6KA1	RPL3	RPL31	RPSA	RPS15A	RPL10	RPL36A	RPS11	RPL21	RPS3A	RPS18
WP_REGULATION_OF_TOLLLIKE_RECEPTOR_SIGNALING_PATHWAY	http://www.gsea-msigdb.org/gsea/msigdb/cards/WP_REGULATION_OF_TOLLLIKE_RECEPTOR_SIGNALING_PATHWAY	PTPN6	RNF41	MAP2K6	CISH	NFKB1
